# Supplementary material
Source: PubMed Central journal article supplement (PMC2947103)
Supplement: ejhg2008257x1.pdf [file ejhg2008257x1.pdf]

# Supplementary Figure 1. Dispersion of predictor values in the full dataset

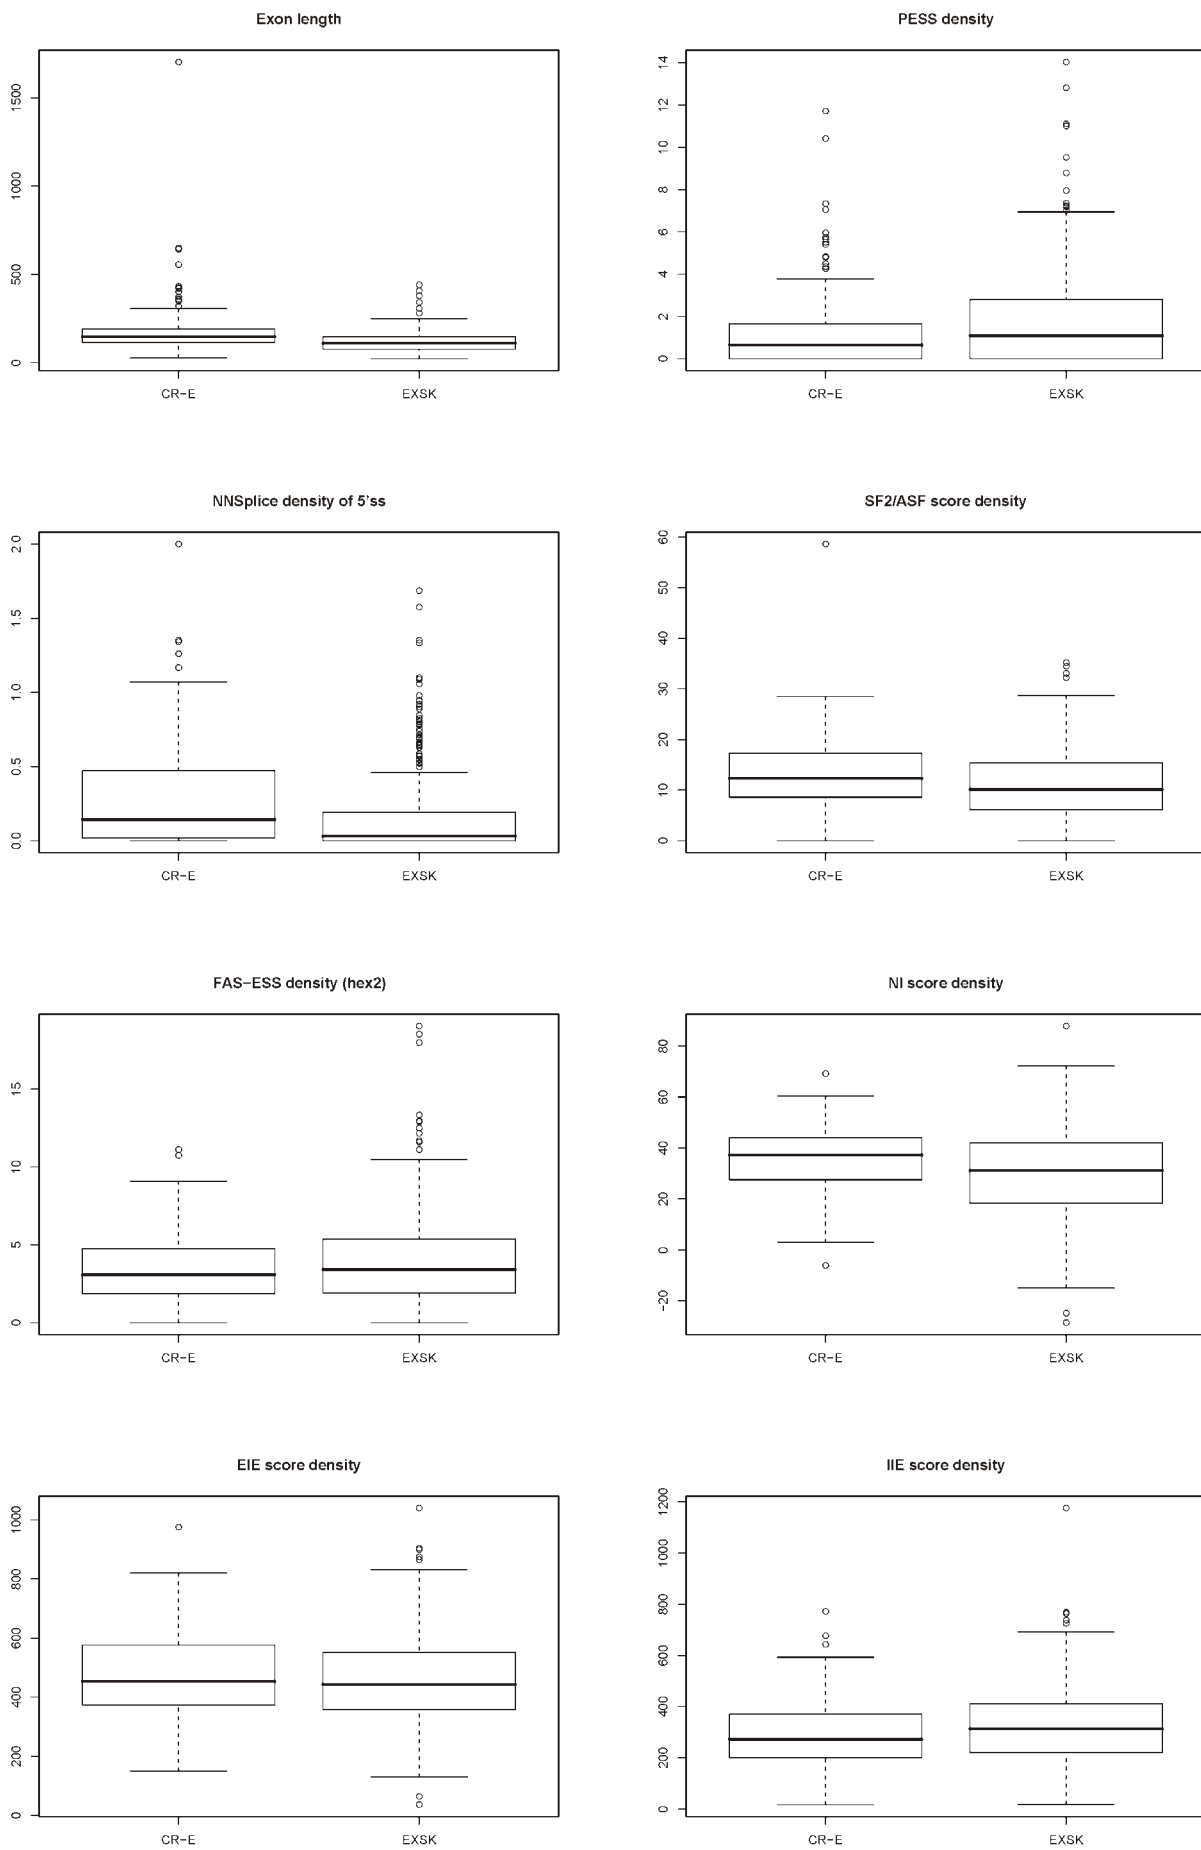

## Supplementary Figure 2. Transformation of selected predictor variables

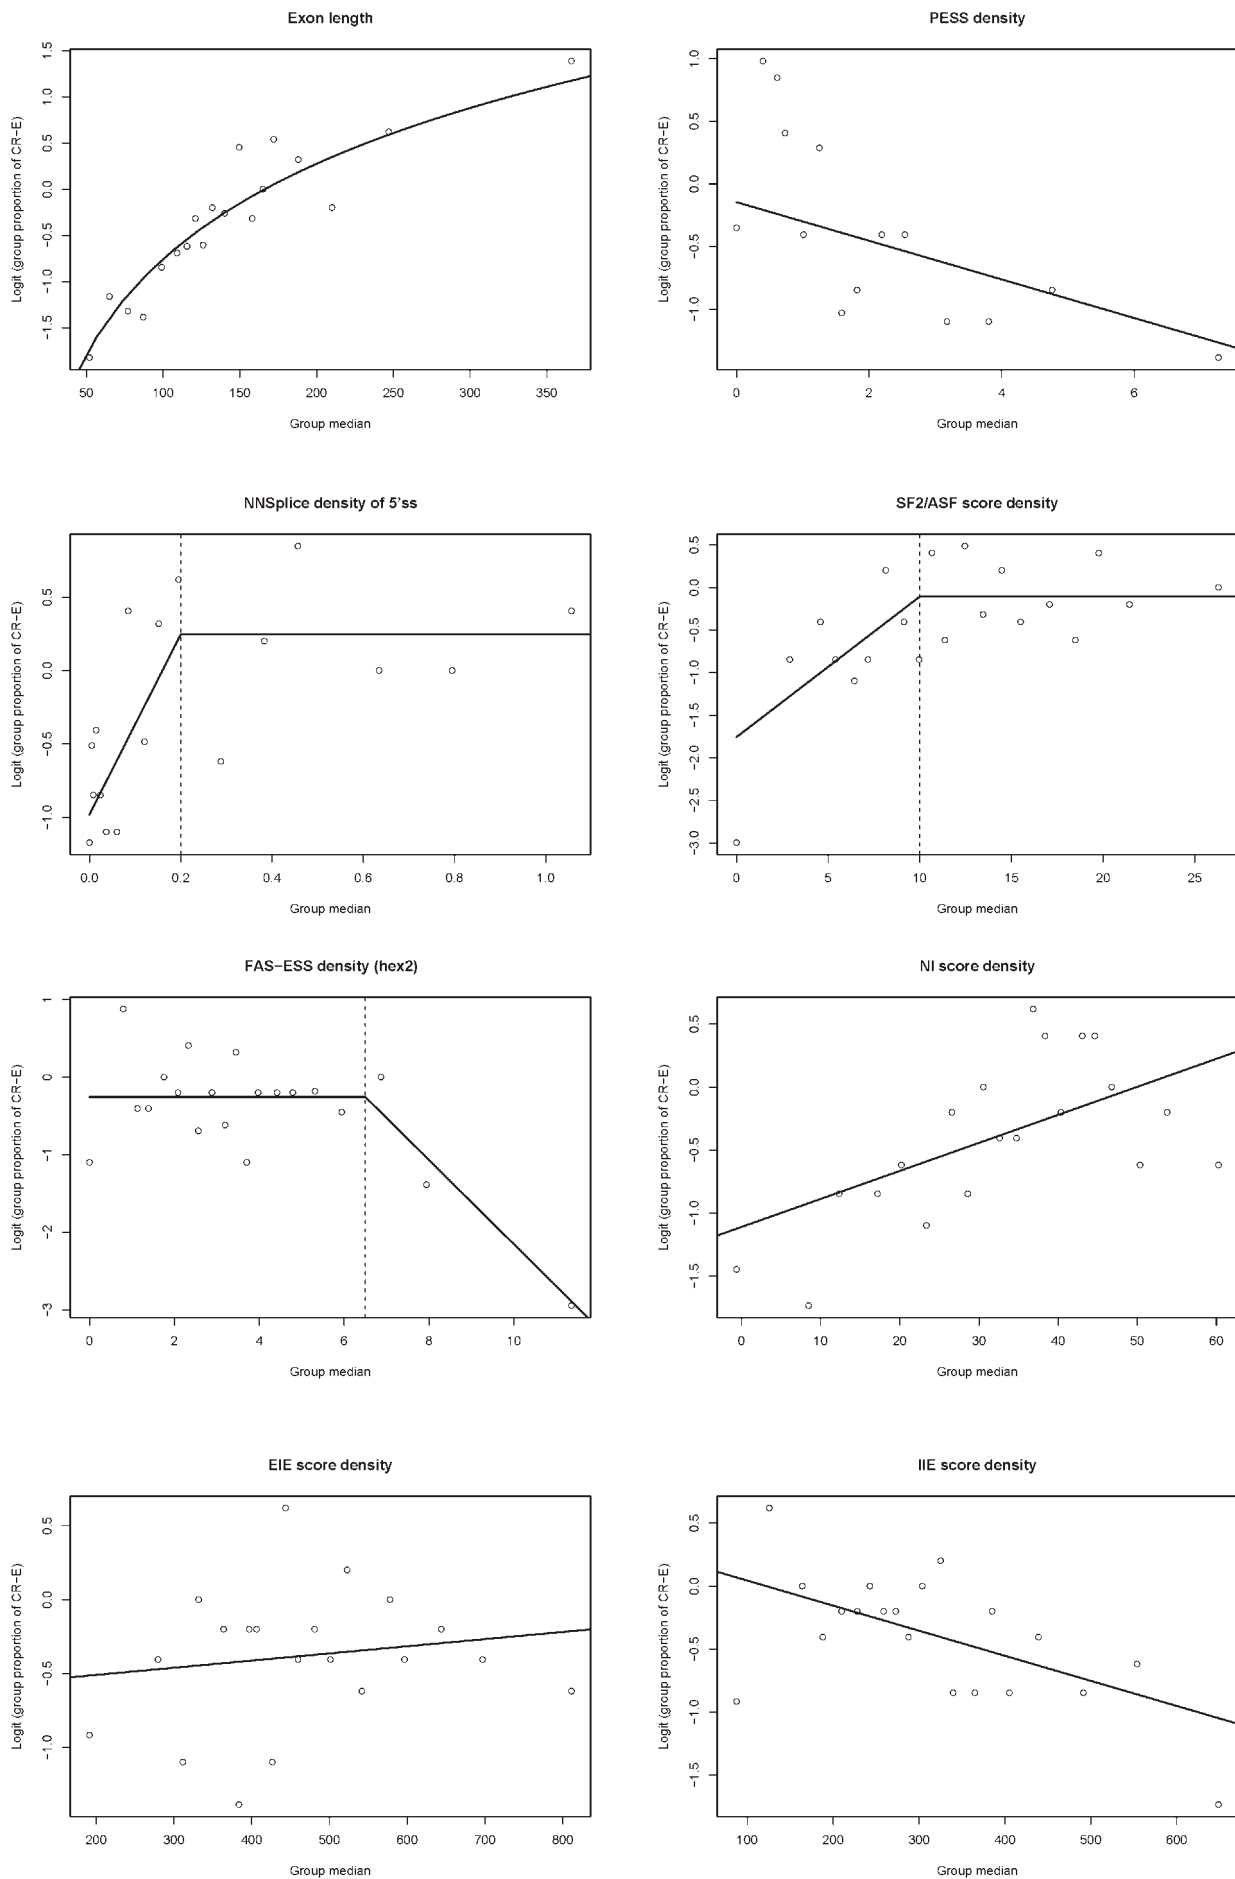

**Supplementary Table 1. Identity of 47 exons that were skipped as a result of disease-causing splice-site mutations**

| Number | Exon length <sup>1</sup> | Gene <sup>2</sup> | Exon number | Pub Med Reference                                                                                                                                                                                                                                                                       |
|--------|--------------------------|-------------------|-------------|-----------------------------------------------------------------------------------------------------------------------------------------------------------------------------------------------------------------------------------------------------------------------------------------|
| >251   | 139                      | <i>ALB</i>        | 11          | <a href="http://www.ncbi.nlm.nih.gov/pubmed/17644793?ordinalpos=46&amp;itool=EntrezSystem2.PEntrez.Pubmed.Pubmed_ResultsPanel.Pubmed_RVDocSum">http://www.ncbi.nlm.nih.gov/pubmed/17644793?ordinalpos=46&amp;itool=EntrezSystem2.PEntrez.Pubmed.Pubmed_ResultsPanel.Pubmed_RVDocSum</a> |
| >252   | 94                       | <i>MLH1</i>       | 10          | <a href="http://www.ncbi.nlm.nih.gov/pubmed/17653898?ordinalpos=44&amp;itool=EntrezSystem2.PEntrez.Pubmed.Pubmed_ResultsPanel.Pubmed_RVDocSum">http://www.ncbi.nlm.nih.gov/pubmed/17653898?ordinalpos=44&amp;itool=EntrezSystem2.PEntrez.Pubmed.Pubmed_ResultsPanel.Pubmed_RVDocSum</a> |
| >253   | 86                       | <i>ALDH3A2</i>    | 2           | <a href="http://www.ncbi.nlm.nih.gov/pubmed/17902024?ordinalpos=32&amp;itool=EntrezSystem2.PEntrez.Pubmed.Pubmed_ResultsPanel.Pubmed_RVDocSum">http://www.ncbi.nlm.nih.gov/pubmed/17902024?ordinalpos=32&amp;itool=EntrezSystem2.PEntrez.Pubmed.Pubmed_ResultsPanel.Pubmed_RVDocSum</a> |
| >254   | 144                      | <i>ALPL</i>       | 7           | <a href="http://www.ncbi.nlm.nih.gov/pubmed/17922851?ordinalpos=31&amp;itool=EntrezSystem2.PEntrez.Pubmed.Pubmed_ResultsPanel.Pubmed_RVDocSum">http://www.ncbi.nlm.nih.gov/pubmed/17922851?ordinalpos=31&amp;itool=EntrezSystem2.PEntrez.Pubmed.Pubmed_ResultsPanel.Pubmed_RVDocSum</a> |
| >255   | 157                      | <i>SETX</i>       | 15          | <a href="http://www.ncbi.nlm.nih.gov/pubmed/18350359?ordinalpos=8&amp;itool=EntrezSystem2.PEntrez.Pubmed.Pubmed_ResultsPanel.Pubmed_RVDocSum">http://www.ncbi.nlm.nih.gov/pubmed/18350359?ordinalpos=8&amp;itool=EntrezSystem2.PEntrez.Pubmed.Pubmed_ResultsPanel.Pubmed_RVDocSum</a>   |
| >256   | 109                      | <i>APIS2</i>      | 3           | <a href="http://www.ncbi.nlm.nih.gov/pubmed/17617514?ordinalpos=50&amp;itool=EntrezSystem2.PEntrez.Pubmed.Pubmed_ResultsPanel.Pubmed_RVDocSum">http://www.ncbi.nlm.nih.gov/pubmed/17617514?ordinalpos=50&amp;itool=EntrezSystem2.PEntrez.Pubmed.Pubmed_ResultsPanel.Pubmed_RVDocSum</a> |
| >257   | 71                       | <i>ARSB</i>       | 6           | <a href="http://www.ncbi.nlm.nih.gov/pubmed/17643332?ordinalpos=48&amp;itool=EntrezSystem2.PEntrez.Pubmed.Pubmed_ResultsPanel.Pubmed_RVDocSum">http://www.ncbi.nlm.nih.gov/pubmed/17643332?ordinalpos=48&amp;itool=EntrezSystem2.PEntrez.Pubmed.Pubmed_ResultsPanel.Pubmed_RVDocSum</a> |
| >258   | 244                      | <i>ARSB</i>       | 5           | <a href="http://www.ncbi.nlm.nih.gov/pubmed/17643332?ordinalpos=48&amp;itool=EntrezSystem2.PEntrez.Pubmed.Pubmed_ResultsPanel.Pubmed_RVDocSum">http://www.ncbi.nlm.nih.gov/pubmed/17643332?ordinalpos=48&amp;itool=EntrezSystem2.PEntrez.Pubmed.Pubmed_ResultsPanel.Pubmed_RVDocSum</a> |
| >259   | 207                      | <i>COL2A1</i>     | 2           | <a href="http://www.ncbi.nlm.nih.gov/pubmed/17721977?ordinalpos=42&amp;itool=EntrezSystem2.PEntrez.Pubmed.Pubmed_ResultsPanel.Pubmed_RVDocSum">http://www.ncbi.nlm.nih.gov/pubmed/17721977?ordinalpos=42&amp;itool=EntrezSystem2.PEntrez.Pubmed.Pubmed_ResultsPanel.Pubmed_RVDocSum</a> |
| >260   | 193                      | <i>DFNA5</i>      | 8           | <a href="http://www.ncbi.nlm.nih.gov/pubmed/14676472?ordinalpos=5&amp;itool=EntrezSystem2.PEntrez.Pubmed.Pubmed_ResultsPanel.Pubmed_RVDocSum">http://www.ncbi.nlm.nih.gov/pubmed/14676472?ordinalpos=5&amp;itool=EntrezSystem2.PEntrez.Pubmed.Pubmed_ResultsPanel.Pubmed_RVDocSum</a>   |
| >261   | 156                      | <i>DMD</i>        | 25          | <a href="http://www.ncbi.nlm.nih.gov/pubmed/18348289?ordinalpos=9&amp;itool=EntrezSystem2.PEntrez.Pubmed.Pubmed_ResultsPanel.Pubmed_RVDocSum">http://www.ncbi.nlm.nih.gov/pubmed/18348289?ordinalpos=9&amp;itool=EntrezSystem2.PEntrez.Pubmed.Pubmed_ResultsPanel.Pubmed_RVDocSum</a>   |
| >262   | 127                      | <i>GRN</i>        | 7           | <a href="http://www.ncbi.nlm.nih.gov/pubmed/18183624?ordinalpos=19&amp;itool=EntrezSystem2.PEntrez.Pubmed.Pubmed_ResultsPanel.Pubmed_RVDocSum">http://www.ncbi.nlm.nih.gov/pubmed/18183624?ordinalpos=19&amp;itool=EntrezSystem2.PEntrez.Pubmed.Pubmed_ResultsPanel.Pubmed_RVDocSum</a> |
| >263   | 36                       | <i>ATP2C1</i>     | 5           | <a href="http://www.ncbi.nlm.nih.gov/pubmed/18372165?ordinalpos=6&amp;itool=EntrezSystem2.PEntrez.Pubmed.Pubmed_ResultsPanel.Pubmed_RVDocSum">http://www.ncbi.nlm.nih.gov/pubmed/18372165?ordinalpos=6&amp;itool=EntrezSystem2.PEntrez.Pubmed.Pubmed_ResultsPanel.Pubmed_RVDocSum</a>   |
| >264   | 115                      | <i>IRAK4</i>      | 7           | <a href="http://www.ncbi.nlm.nih.gov/pubmed/17878374?ordinalpos=37&amp;itool=EntrezSystem2.PEntrez.Pubmed.Pubmed_ResultsPanel.Pubmed_RVDocSum">http://www.ncbi.nlm.nih.gov/pubmed/17878374?ordinalpos=37&amp;itool=EntrezSystem2.PEntrez.Pubmed.Pubmed_ResultsPanel.Pubmed_RVDocSum</a> |
| >265   | 171                      | <i>BRCA2</i>      | 17          | <a href="http://www.ncbi.nlm.nih.gov/pubmed/18424508?ordinalpos=3&amp;itool=EntrezSystem2.PEntrez.Pubmed.Pubmed_ResultsPanel.Pubmed_RVDocSum">http://www.ncbi.nlm.nih.gov/pubmed/18424508?ordinalpos=3&amp;itool=EntrezSystem2.PEntrez.Pubmed.Pubmed_ResultsPanel.Pubmed_RVDocSum</a>   |
| >266   | 249                      | <i>BRCA2</i>      | 3           | <a href="http://www.ncbi.nlm.nih.gov/pubmed/18424508?ordinalpos=3&amp;itool=EntrezSystem2.PEntrez.Pubmed.Pubmed_ResultsPanel.Pubmed_RVDocSum">http://www.ncbi.nlm.nih.gov/pubmed/18424508?ordinalpos=3&amp;itool=EntrezSystem2.PEntrez.Pubmed.Pubmed_ResultsPanel.Pubmed_RVDocSum</a>   |
| >267   | 245                      | <i>BRCA2</i>      | 25          | <a href="http://www.ncbi.nlm.nih.gov/pubmed/18424508?ordinalpos=3&amp;itool=EntrezSystem2.PEntrez.Pubmed.Pubmed_ResultsPanel.Pubmed_RVDocSum">http://www.ncbi.nlm.nih.gov/pubmed/18424508?ordinalpos=3&amp;itool=EntrezSystem2.PEntrez.Pubmed.Pubmed_ResultsPanel.Pubmed_RVDocSum</a>   |
| >268   | 128                      | <i>LAMA2</i>      | 17          | <a href="http://www.ncbi.nlm.nih.gov/pubmed/18053718?ordinalpos=27&amp;itool=EntrezSystem2.PEntrez.Pubmed.Pubmed_ResultsPanel.Pubmed_RVDocSum">http://www.ncbi.nlm.nih.gov/pubmed/18053718?ordinalpos=27&amp;itool=EntrezSystem2.PEntrez.Pubmed.Pubmed_ResultsPanel.Pubmed_RVDocSum</a> |
| >269   | 116                      | <i>MPV17</i>      | 2           | <a href="http://www.ncbi.nlm.nih.gov/pubmed/18329934?ordinalpos=13&amp;itool=EntrezSystem2.PEntrez.Pubmed.Pubmed_ResultsPanel.Pubmed_RVDocSum">http://www.ncbi.nlm.nih.gov/pubmed/18329934?ordinalpos=13&amp;itool=EntrezSystem2.PEntrez.Pubmed.Pubmed_ResultsPanel.Pubmed_RVDocSum</a> |
| >270   | 127                      | <i>NR2E3</i>      | 2           | <a href="http://www.ncbi.nlm.nih.gov/pubmed/18294254?ordinalpos=15&amp;itool=EntrezSystem2.PEntrez.Pubmed.Pubmed_ResultsPanel.Pubmed_RVDocSum">http://www.ncbi.nlm.nih.gov/pubmed/18294254?ordinalpos=15&amp;itool=EntrezSystem2.PEntrez.Pubmed.Pubmed_ResultsPanel.Pubmed_RVDocSum</a> |
| >271   | 87                       | <i>PHEX</i>       | 4           | <a href="http://www.ncbi.nlm.nih.gov/pubmed/18252791?ordinalpos=16&amp;itool=EntrezSystem2.PEntrez.Pubmed.Pubmed_ResultsPanel.Pubmed_RVDocSum">http://www.ncbi.nlm.nih.gov/pubmed/18252791?ordinalpos=16&amp;itool=EntrezSystem2.PEntrez.Pubmed.Pubmed_ResultsPanel.Pubmed_RVDocSum</a> |
| >272   | 157                      | <i>CC2D2A</i>     | 19          | <a href="http://www.ncbi.nlm.nih.gov/pubmed/18387594?ordinalpos=1&amp;itool=EntrezSystem2.PEntrez.Pubmed.Pubmed_ResultsPanel.Pubmed_RVDocSum">http://www.ncbi.nlm.nih.gov/pubmed/18387594?ordinalpos=1&amp;itool=EntrezSystem2.PEntrez.Pubmed.Pubmed_ResultsPanel.Pubmed_RVDocSum</a>   |
| >273   | 118                      | <i>POMGNT1</i>    | 7           | <a href="http://www.ncbi.nlm.nih.gov/pubmed/18330676?ordinalpos=2&amp;itool=EntrezSystem2.PEntrez.Pubmed.Pubmed_ResultsPanel.Pubmed_RVDocSum">http://www.ncbi.nlm.nih.gov/pubmed/18330676?ordinalpos=2&amp;itool=EntrezSystem2.PEntrez.Pubmed.Pubmed_ResultsPanel.Pubmed_RVDocSum</a>   |
| >274   | 140                      | <i>MYBPC3</i>     | 30          | <a href="http://www.ncbi.nlm.nih.gov/pubmed/17937428?ordinalpos=1&amp;itool=EntrezSystem2.PEntrez.Pubmed.Pubmed_ResultsPanel.Pubmed_RVDocSum">http://www.ncbi.nlm.nih.gov/pubmed/17937428?ordinalpos=1&amp;itool=EntrezSystem2.PEntrez.Pubmed.Pubmed_ResultsPanel.Pubmed_RVDocSum</a>   |
| >275   | 127                      | <i>RBI</i>        | 2           | <a href="http://www.ncbi.nlm.nih.gov/pubmed/18181215?ordinalpos=1&amp;itool=EntrezSystem2.PEntrez.Pubmed.Pubmed_ResultsPanel.Pubmed_RVDocSum">http://www.ncbi.nlm.nih.gov/pubmed/18181215?ordinalpos=1&amp;itool=EntrezSystem2.PEntrez.Pubmed.Pubmed_ResultsPanel.Pubmed_RVDocSum</a>   |
| >276   | 116                      | <i>RBI</i>        | 3           | <a href="http://www.ncbi.nlm.nih.gov/pubmed/18181215?ordinalpos=1&amp;itool=EntrezSystem2.PEntrez.Pubmed.Pubmed_ResultsPanel.Pubmed_RVDocSum">http://www.ncbi.nlm.nih.gov/pubmed/18181215?ordinalpos=1&amp;itool=EntrezSystem2.PEntrez.Pubmed.Pubmed_ResultsPanel.Pubmed_RVDocSum</a>   |
| >277   | 78                       | <i>RBI</i>        | 9           | <a href="http://www.ncbi.nlm.nih.gov/pubmed/18181215?ordinalpos=1&amp;itool=EntrezSystem2.PEntrez.Pubmed.Pubmed_ResultsPanel.Pubmed_RVDocSum">http://www.ncbi.nlm.nih.gov/pubmed/18181215?ordinalpos=1&amp;itool=EntrezSystem2.PEntrez.Pubmed.Pubmed_ResultsPanel.Pubmed_RVDocSum</a>   |
| >278   | 110                      | <i>RBI</i>        | 10          | <a href="http://www.ncbi.nlm.nih.gov/pubmed/18181215?ordinalpos=1&amp;itool=EntrezSystem2.PEntrez.Pubmed.Pubmed_ResultsPanel.Pubmed_RVDocSum">http://www.ncbi.nlm.nih.gov/pubmed/18181215?ordinalpos=1&amp;itool=EntrezSystem2.PEntrez.Pubmed.Pubmed_ResultsPanel.Pubmed_RVDocSum</a>   |
| >279   | 88                       | <i>RBI</i>        | 12          | <a href="http://www.ncbi.nlm.nih.gov/pubmed/18181215?ordinalpos=1&amp;itool=EntrezSystem2.PEntrez.Pubmed.Pubmed_ResultsPanel.Pubmed_RVDocSum">http://www.ncbi.nlm.nih.gov/pubmed/18181215?ordinalpos=1&amp;itool=EntrezSystem2.PEntrez.Pubmed.Pubmed_ResultsPanel.Pubmed_RVDocSum</a>   |
| >280   | 117                      | <i>RBI</i>        | 13          | <a href="http://www.ncbi.nlm.nih.gov/pubmed/18181215?ordinalpos=1&amp;itool=EntrezSystem2.PEntrez.Pubmed.Pubmed_ResultsPanel.Pubmed_RVDocSum">http://www.ncbi.nlm.nih.gov/pubmed/18181215?ordinalpos=1&amp;itool=EntrezSystem2.PEntrez.Pubmed.Pubmed_ResultsPanel.Pubmed_RVDocSum</a>   |
| >281   | 32                       | <i>RBI</i>        | 15          | <a href="http://www.ncbi.nlm.nih.gov/pubmed/18181215?ordinalpos=1&amp;itool=EntrezSystem2.PEntrez.Pubmed.Pubmed_ResultsPanel.Pubmed_RVDocSum">http://www.ncbi.nlm.nih.gov/pubmed/18181215?ordinalpos=1&amp;itool=EntrezSystem2.PEntrez.Pubmed.Pubmed_ResultsPanel.Pubmed_RVDocSum</a>   |
| >282   | 197                      | <i>RBI</i>        | 17          | <a href="http://www.ncbi.nlm.nih.gov/pubmed/18181215?ordinalpos=1&amp;itool=EntrezSystem2.PEntrez.Pubmed.Pubmed_ResultsPanel.Pubmed_RVDocSum">http://www.ncbi.nlm.nih.gov/pubmed/18181215?ordinalpos=1&amp;itool=EntrezSystem2.PEntrez.Pubmed.Pubmed_ResultsPanel.Pubmed_RVDocSum</a>   |

|      |     |                |    |                                                                                                                                                                                                                                                                                         |
|------|-----|----------------|----|-----------------------------------------------------------------------------------------------------------------------------------------------------------------------------------------------------------------------------------------------------------------------------------------|
| >283 | 146 | <i>RBI</i>     | 19 | <a href="http://www.ncbi.nlm.nih.gov/pubmed/18181215?ordinalpos=1&amp;itool=EntrezSystem2.PEntrez.Pubmed.Pubmed_ResultsPanel.Pubmed_RVDocSum">http://www.ncbi.nlm.nih.gov/pubmed/18181215?ordinalpos=1&amp;itool=EntrezSystem2.PEntrez.Pubmed.Pubmed_ResultsPanel.Pubmed_RVDocSum</a>   |
| >284 | 105 | <i>RBI</i>     | 21 | <a href="http://www.ncbi.nlm.nih.gov/pubmed/18181215?ordinalpos=1&amp;itool=EntrezSystem2.PEntrez.Pubmed.Pubmed_ResultsPanel.Pubmed_RVDocSum">http://www.ncbi.nlm.nih.gov/pubmed/18181215?ordinalpos=1&amp;itool=EntrezSystem2.PEntrez.Pubmed.Pubmed_ResultsPanel.Pubmed_RVDocSum</a>   |
| >285 | 31  | <i>RBI</i>     | 24 | <a href="http://www.ncbi.nlm.nih.gov/pubmed/18181215?ordinalpos=1&amp;itool=EntrezSystem2.PEntrez.Pubmed.Pubmed_ResultsPanel.Pubmed_RVDocSum">http://www.ncbi.nlm.nih.gov/pubmed/18181215?ordinalpos=1&amp;itool=EntrezSystem2.PEntrez.Pubmed.Pubmed_ResultsPanel.Pubmed_RVDocSum</a>   |
| >286 | 143 | <i>RBI</i>     | 25 | <a href="http://www.ncbi.nlm.nih.gov/pubmed/18181215?ordinalpos=1&amp;itool=EntrezSystem2.PEntrez.Pubmed.Pubmed_ResultsPanel.Pubmed_RVDocSum">http://www.ncbi.nlm.nih.gov/pubmed/18181215?ordinalpos=1&amp;itool=EntrezSystem2.PEntrez.Pubmed.Pubmed_ResultsPanel.Pubmed_RVDocSum</a>   |
| >287 | 156 | <i>SLC12A3</i> | 14 | <a href="http://www.ncbi.nlm.nih.gov/pubmed/17414160?ordinalpos=6&amp;itool=EntrezSystem2.PEntrez.Pubmed.Pubmed_ResultsPanel.Pubmed_RVDocSum">http://www.ncbi.nlm.nih.gov/pubmed/17414160?ordinalpos=6&amp;itool=EntrezSystem2.PEntrez.Pubmed.Pubmed_ResultsPanel.Pubmed_RVDocSum</a>   |
| >288 | 71  | <i>SPG4</i>    | 15 | <a href="http://www.ncbi.nlm.nih.gov/pubmed/18190593?ordinalpos=18&amp;itool=EntrezSystem2.PEntrez.Pubmed.Pubmed_ResultsPanel.Pubmed_RVDocSum">http://www.ncbi.nlm.nih.gov/pubmed/18190593?ordinalpos=18&amp;itool=EntrezSystem2.PEntrez.Pubmed.Pubmed_ResultsPanel.Pubmed_RVDocSum</a> |
| >289 | 110 | <i>F11</i>     | 6  | <a href="http://www.ncbi.nlm.nih.gov/pubmed/18327400?ordinalpos=2&amp;itool=EntrezSystem2.PEntrez.Pubmed.Pubmed_ResultsPanel.Pubmed_RVDocSum">http://www.ncbi.nlm.nih.gov/pubmed/18327400?ordinalpos=2&amp;itool=EntrezSystem2.PEntrez.Pubmed.Pubmed_ResultsPanel.Pubmed_RVDocSum</a>   |
| >290 | 107 | <i>F11</i>     | 4  | <a href="http://www.ncbi.nlm.nih.gov/pubmed/18327400?ordinalpos=2&amp;itool=EntrezSystem2.PEntrez.Pubmed.Pubmed_ResultsPanel.Pubmed_RVDocSum">http://www.ncbi.nlm.nih.gov/pubmed/18327400?ordinalpos=2&amp;itool=EntrezSystem2.PEntrez.Pubmed.Pubmed_ResultsPanel.Pubmed_RVDocSum</a>   |
| >291 | 78  | <i>EIF2B5</i>  | 2  | <a href="http://www.ncbi.nlm.nih.gov/pubmed/18294360?ordinalpos=1&amp;itool=EntrezSystem2.PEntrez.Pubmed.Pubmed_ResultsPanel.Pubmed_RVDocSum">http://www.ncbi.nlm.nih.gov/pubmed/18294360?ordinalpos=1&amp;itool=EntrezSystem2.PEntrez.Pubmed.Pubmed_ResultsPanel.Pubmed_RVDocSum</a>   |
| >292 | 49  | <i>CD19</i>    | 6  | <a href="http://www.ncbi.nlm.nih.gov/pubmed/17882224?ordinalpos=5&amp;itool=EntrezSystem2.PEntrez.Pubmed.Pubmed_ResultsPanel.Pubmed_RVDocSum">http://www.ncbi.nlm.nih.gov/pubmed/17882224?ordinalpos=5&amp;itool=EntrezSystem2.PEntrez.Pubmed.Pubmed_ResultsPanel.Pubmed_RVDocSum</a>   |
| >293 | 75  | <i>OPA1</i>    | 12 | <a href="http://www.ncbi.nlm.nih.gov/pubmed/17722006?ordinalpos=3&amp;itool=EntrezSystem2.PEntrez.Pubmed.Pubmed_ResultsPanel.Pubmed_RVDocSum">http://www.ncbi.nlm.nih.gov/pubmed/17722006?ordinalpos=3&amp;itool=EntrezSystem2.PEntrez.Pubmed.Pubmed_ResultsPanel.Pubmed_RVDocSum</a>   |
| >294 | 131 | <i>OPA1</i>    | 15 | <a href="http://www.ncbi.nlm.nih.gov/pubmed/17722006?ordinalpos=3&amp;itool=EntrezSystem2.PEntrez.Pubmed.Pubmed_ResultsPanel.Pubmed_RVDocSum">http://www.ncbi.nlm.nih.gov/pubmed/17722006?ordinalpos=3&amp;itool=EntrezSystem2.PEntrez.Pubmed.Pubmed_ResultsPanel.Pubmed_RVDocSum</a>   |
| >295 | 125 | <i>KIND1</i>   | 10 | <a href="http://www.ncbi.nlm.nih.gov/pubmed/17854379?ordinalpos=3&amp;itool=EntrezSystem2.PEntrez.Pubmed.Pubmed_ResultsPanel.Pubmed_RVDocSum">http://www.ncbi.nlm.nih.gov/pubmed/17854379?ordinalpos=3&amp;itool=EntrezSystem2.PEntrez.Pubmed.Pubmed_ResultsPanel.Pubmed_RVDocSum</a>   |
| >296 | 193 | <i>DFNA5</i>   | 8  | <a href="http://www.ncbi.nlm.nih.gov/pubmed/17868390?ordinalpos=2&amp;itool=EntrezSystem2.PEntrez.Pubmed.Pubmed_ResultsPanel.Pubmed_RVDocSum">http://www.ncbi.nlm.nih.gov/pubmed/17868390?ordinalpos=2&amp;itool=EntrezSystem2.PEntrez.Pubmed.Pubmed_ResultsPanel.Pubmed_RVDocSum</a>   |
| >297 | 113 | <i>LAMA2</i>   | 58 | <a href="http://www.ncbi.nlm.nih.gov/pubmed/17949279?ordinalpos=2&amp;itool=EntrezSystem2.PEntrez.Pubmed.Pubmed_ResultsPanel.Pubmed_RVDocSum">http://www.ncbi.nlm.nih.gov/pubmed/17949279?ordinalpos=2&amp;itool=EntrezSystem2.PEntrez.Pubmed.Pubmed_ResultsPanel.Pubmed_RVDocSum</a>   |

Footnote: <sup>1</sup>exon length is in nucleotides. <sup>2</sup>, gene designation is according to the HUGO Gene Nomenclature Committee.

**Supplemental Table 2. Values of predictor variables for each exon**

| Test set | Mutation outcome | Exon length | PESS density | NNSplice density of 5'ss | SF2/ASF score density | FASS-ESS density (hex2) | NI score density | EIE score density | IIE score density |
|----------|------------------|-------------|--------------|--------------------------|-----------------------|-------------------------|------------------|-------------------|-------------------|
| 0        | 0                | 57          | 0            | 0                        | 14.347                | 8.772                   | 14.888           | 508.467           | 242.415           |
| 0        | 0                | 105         | 3.810        | 0.133                    | 10.234                | 10.476                  | 18.331           | 364.650           | 347.612           |
| 0        | 0                | 96          | 2.083        | 0.010                    | 6.419                 | 4.167                   | 28.545           | 874.358           | 382.065           |
| 0        | 0                | 158         | 3.797        | 0.259                    | 1.482                 | 3.165                   | 18.067           | 591.991           | 535.705           |
| 0        | 0                | 62          | 1.613        | 0                        | 10.117                | 1.613                   | 40.180           | 537.036           | 90.962            |
| 0        | 0                | 116         | 0            | 0.017                    | 23.213                | 6.034                   | 34.651           | 369.193           | 307.375           |
| 1        | 0                | 72          | 0            | 0.139                    | 24.767                | 5.556                   | 36.050           | 267.291           | 316.581           |
| 0        | 0                | 130         | 2.308        | 0                        | 19.299                | 0.769                   | 42.086           | 596.593           | 111.233           |
| 0        | 0                | 134         | 2.239        | 0.067                    | 7.219                 | 2.239                   | 36.067           | 659.179           | 392.362           |
| 0        | 0                | 118         | 1.695        | 0.017                    | 10.364                | 2.542                   | 31.749           | 621.668           | 336.734           |
| 0        | 0                | 167         | 7.186        | 0.497                    | 0                     | 1.198                   | 16.644           | 587.357           | 364.635           |
| 0        | 0                | 144         | 4.167        | 0.306                    | 3.537                 | 5.556                   | 14.995           | 376.424           | 366.229           |
| 0        | 0                | 59          | 0            | 0.424                    | 32.170                | 5.085                   | 20.538           | 313.341           | 271.354           |
| 0        | 0                | 147         | 0            | 0.660                    | 8.155                 | 4.762                   | 38.168           | 373.869           | 346.430           |
| 1        | 0                | 379         | 2.375        | 0.011                    | 7.279                 | 2.111                   | 26.663           | 331.519           | 341.046           |
| 0        | 0                | 218         | 0.917        | 0.032                    | 5.778                 | 1.376                   | 32.645           | 395.809           | 413.166           |
| 0        | 0                | 158         | 1.266        | 0                        | 7.356                 | 1.899                   | 47.797           | 659.483           | 189.590           |
| 0        | 0                | 57          | 1.754        | 0.754                    | 0                     | 0                       | 35.848           | 692.396           | 363.758           |
| 0        | 0                | 102         | 1.961        | 0.127                    | 6.776                 | 0.980                   | 31.188           | 440.311           | 406.561           |
| 0        | 0                | 239         | 3.766        | 0.013                    | 9.017                 | 0.837                   | 18.032           | 538.253           | 361.103           |
| 1        | 0                | 164         | 3.049        | 0.006                    | 3.130                 | 1.220                   | 16.828           | 478.165           | 378.029           |
| 0        | 0                | 126         | 1.587        | 0.063                    | 6.423                 | 7.937                   | 9.263            | 439.037           | 474.231           |
| 1        | 0                | 126         | 6.349        | 0.008                    | 6.336                 | 2.381                   | 18.624           | 473.473           | 326.764           |
| 0        | 0                | 83          | 1.205        | 0.024                    | 2.701                 | 4.819                   | 25.416           | 630.571           | 317.839           |
| 0        | 0                | 131         | 3.817        | 0.214                    | 4.510                 | 4.580                   | 4.025            | 288.042           | 343.935           |
| 0        | 0                | 174         | 3.448        | 0.046                    | 5.426                 | 2.874                   | 27.955           | 609.817           | 578.768           |
| 0        | 0                | 165         | 1.818        | 0                        | 7.676                 | 6.667                   | 8.501            | 381.942           | 518.007           |
| 0        | 0                | 133         | 3.008        | 0.737                    | 9.367                 | 4.511                   | 34.074           | 578.014           | 285.713           |
| 1        | 0                | 88          | 0            | 0.045                    | 6.985                 | 5.682                   | 35.422           | 899.012           | 238.860           |
| 0        | 0                | 89          | 4.494        | 0.011                    | 3.894                 | 17.978                  | 6.679            | 548.099           | 530.404           |
| 1        | 0                | 105         | 2.857        | 0.019                    | 5.229                 | 0                       | 30.602           | 648.413           | 159.764           |
| 0        | 0                | 159         | 4.403        | 0.403                    | 13.503                | 1.887                   | 23.647           | 511.418           | 280.416           |
| 0        | 0                | 141         | 0.709        | 0.348                    | 13.402                | 6.383                   | 10.044           | 495.582           | 281.970           |
| 0        | 0                | 115         | 1.739        | 0.017                    | 12.708                | 4.348                   | 11.929           | 306.722           | 581.399           |
| 0        | 0                | 234         | 3.846        | 0.158                    | 4.870                 | 2.991                   | 8.572            | 354.446           | 509.374           |
| 1        | 0                | 162         | 1.235        | 0                        | 10.551                | 3.704                   | 26.653           | 336.286           | 232.753           |
| 0        | 0                | 204         | 2.451        | 0.093                    | 20.749                | 9.314                   | 32.154           | 289.646           | 322.575           |
| 0        | 0                | 78          | 1.282        | 0.013                    | 5.793                 | 0                       | 33.137           | 480.370           | 263.661           |
| 0        | 0                | 89          | 4.494        | 0                        | 2.433                 | 6.742                   | -0.101           | 387.882           | 442.157           |
| 0        | 0                | 82          | 0            | 0                        | 9.865                 | 0                       | 37.047           | 521.593           | 245.704           |

| Test set | Mutation outcome | Exon length | PESS density | NNSplice density of 5'ss | SF2/ASF score density | FASS-ESS density (hex2) | NI score density | EIE score density | IIE score density |
|----------|------------------|-------------|--------------|--------------------------|-----------------------|-------------------------|------------------|-------------------|-------------------|
| 0        | 0                | 63          | 4.762        | 0.159                    | 12.349                | 0                       | 21.663           | 584.565           | 49.220            |
| 0        | 0                | 217         | 0.461        | 0.009                    | 8.137                 | 1.382                   | 51.707           | 493.260           | 188.941           |
| 0        | 0                | 119         | 0            | 0.008                    | 15.019                | 5.882                   | 25.173           | 210.046           | 336.599           |
| 0        | 0                | 169         | 0            | 0.462                    | 15.839                | 6.509                   | 38.502           | 430.976           | 352.735           |
| 0        | 0                | 307         | 1.303        | 0.013                    | 13.317                | 5.537                   | 22.081           | 282.233           | 437.393           |
| 0        | 0                | 63          | 1.587        | 0                        | 0                     | 19.048                  | -24.813          | 35.721            | 1175.634          |
| 0        | 0                | 48          | 0            | 0                        | 13.948                | 0                       | 45.477           | 485.588           | 89.438            |
| 0        | 0                | 111         | 0            | 0                        | 13.474                | 0.901                   | 41.688           | 591.480           | 398.583           |
| 0        | 0                | 109         | 11.009       | 0                        | 2.900                 | 7.339                   | -4.014           | 526.100           | 664.347           |
| 0        | 0                | 216         | 2.315        | 0.060                    | 9.171                 | 3.704                   | 14.440           | 457.563           | 385.142           |
| 0        | 0                | 87          | 4.598        | 0                        | 0                     | 2.299                   | 7.025            | 630.275           | 685.181           |
| 1        | 0                | 115         | 0            | 0                        | 15.753                | 5.217                   | 31.498           | 316.697           | 219.820           |
| 0        | 0                | 242         | 0            | 0.008                    | 19.159                | 2.479                   | 46.661           | 309.584           | 267.307           |
| 0        | 0                | 54          | 0            | 0.056                    | 15.774                | 12.963                  | 40.339           | 690.934           | 242.886           |
| 0        | 0                | 54          | 0            | 0.630                    | 8.024                 | 3.704                   | 60.179           | 280.530           | 209.135           |
| 0        | 0                | 108         | 0            | 0.046                    | 9.673                 | 7.407                   | 57.907           | 526.004           | 214.502           |
| 0        | 0                | 54          | 0            | 0.019                    | 5.079                 | 0                       | 50.087           | 766.048           | 341.859           |
| 0        | 0                | 54          | 0            | 0.074                    | 0                     | 3.704                   | 48.329           | 406.136           | 269.034           |
| 0        | 0                | 54          | 0            | 0.111                    | 0                     | 3.704                   | 64.131           | 622.168           | 166.790           |
| 1        | 0                | 54          | 0            | 0.074                    | 0                     | 3.704                   | 58.199           | 482.011           | 215.593           |
| 0        | 0                | 54          | 0            | 1.574                    | 25.235                | 1.852                   | 72.161           | 817.434           | 103.032           |
| 1        | 0                | 54          | 0            | 1.685                    | 19.053                | 9.259                   | 43.277           | 273.687           | 346.164           |
| 0        | 0                | 99          | 1.010        | 0.030                    | 15.277                | 3.030                   | 52.736           | 699.373           | 217.233           |
| 0        | 0                | 45          | 6.667        | 0.889                    | 0                     | 13.333                  | -13.217          | 172.758           | 403.470           |
| 0        | 0                | 54          | 0            | 0                        | 18.379                | 3.704                   | 51.730           | 366.415           | 157.558           |
| 0        | 0                | 99          | 1.010        | 0.919                    | 9.167                 | 2.020                   | 40.718           | 458.134           | 261.410           |
| 0        | 0                | 54          | 1.852        | 0.130                    | 14.201                | 3.704                   | 53.543           | 903.475           | 119.469           |
| 0        | 0                | 54          | 0            | 0.019                    | 24.071                | 3.704                   | 59.093           | 730.356           | 183.877           |
| 0        | 0                | 45          | 0            | 0.400                    | 11.763                | 2.222                   | 43.876           | 337.744           | 105.099           |
| 1        | 0                | 54          | 0            | 0                        | 8.521                 | 3.704                   | 43.552           | 525.751           | 182.071           |
| 1        | 0                | 108         | 0.926        | 1.352                    | 9.467                 | 2.778                   | 57.624           | 831.288           | 268.760           |
| 0        | 0                | 54          | 0            | 0.648                    | 6.151                 | 11.111                  | 48.376           | 401.926           | 222.379           |
| 0        | 0                | 108         | 0.926        | 0.019                    | 20.908                | 4.630                   | 29.746           | 288.956           | 325.958           |
| 0        | 0                | 54          | 0            | 0                        | 10.165                | 9.259                   | 51.211           | 551.704           | 189.912           |
| 0        | 0                | 54          | 0            | 0.259                    | 13.715                | 0                       | 51.344           | 339.206           | 384.811           |
| 0        | 0                | 165         | 0            | 0.067                    | 17.753                | 3.636                   | 48.547           | 412.864           | 168.583           |
| 0        | 0                | 81          | 0            | 1.099                    | 5.533                 | 11.111                  | 45.683           | 563.864           | 203.422           |
| 0        | 0                | 99          | 0            | 0.232                    | 13.108                | 8.081                   | 44.754           | 543.835           | 249.548           |
| 0        | 0                | 213         | 2.347        | 0.413                    | 14.326                | 3.756                   | 26.709           | 397.912           | 319.173           |
| 0        | 0                | 178         | 2.247        | 0                        | 5.152                 | 1.685                   | 17.249           | 368.001           | 238.940           |

| Test set | Mutation outcome | Exon length | PESS density | NNSplice density of 5'ss | SF2/ASF score density | FASS-ESS density (hex2) | NI score density | EIE score density | IIE score density |
|----------|------------------|-------------|--------------|--------------------------|-----------------------|-------------------------|------------------|-------------------|-------------------|
| 0        | 0                | 54          | 0            | 0.037                    | 15.885                | 18.519                  | 18.600           | 221.137           | 299.517           |
| 1        | 0                | 51          | 0            | 0                        | 33.044                | 0                       | 68.132           | 616.062           | 99.373            |
| 1        | 0                | 36          | 0            | 0                        | 9.766                 | 5.556                   | 44.393           | 726.560           | 91.268            |
| 0        | 0                | 36          | 0            | 1.333                    | 16.822                | 2.778                   | 54.838           | 413.796           | 213.361           |
| 0        | 0                | 103         | 0.971        | 0.117                    | 18.863                | 5.825                   | 38.734           | 701.832           | 399.918           |
| 0        | 0                | 105         | 0.952        | 0.029                    | 1.892                 | 4.762                   | 17.761           | 243.278           | 477.104           |
| 0        | 0                | 139         | 0            | 0.698                    | 8.078                 | 2.158                   | 49.239           | 416.109           | 99.710            |
| 0        | 0                | 198         | 1.010        | 0.035                    | 5.133                 | 2.525                   | 27.550           | 426.377           | 335.619           |
| 1        | 0                | 79          | 0            | 0                        | 10.598                | 0                       | 47.766           | 594.757           | 331.211           |
| 1        | 0                | 102         | 1.961        | 0.039                    | 9.037                 | 0.980                   | 39.510           | 676.115           | 317.571           |
| 1        | 0                | 130         | 0            | 0                        | 14.460                | 5.385                   | 34.809           | 501.741           | 258.979           |
| 1        | 0                | 146         | 0.685        | 0                        | 11.400                | 4.110                   | 40.006           | 472.372           | 219.038           |
| 1        | 0                | 86          | 3.488        | 0.081                    | 19.054                | 2.326                   | 31.448           | 365.083           | 454.334           |
| 0        | 0                | 165         | 1.818        | 0.152                    | 6.702                 | 1.212                   | 36.407           | 405.555           | 282.803           |
| 0        | 0                | 134         | 0            | 0.015                    | 12.051                | 2.239                   | 28.698           | 318.194           | 562.911           |
| 0        | 0                | 71          | 4.225        | 0                        | 8.831                 | 9.859                   | 8.686            | 330.370           | 221.228           |
| 0        | 0                | 69          | 0            | 0.014                    | 18.240                | 11.594                  | 35.713           | 256.142           | 384.787           |
| 0        | 0                | 152         | 0            | 0.026                    | 13.241                | -0.0001.974             | 31.236           | 264.412           | 293.637           |
| 1        | 0                | 163         | 0            | 0                        | 16.849                | 1.840                   | 57.256           | 350.745           | 143.676           |
| 0        | 0                | 161         | 0.621        | 0.056                    | 20.177                | 6.832                   | 29.073           | 343.297           | 339.685           |
| 0        | 0                | 161         | 0            | 0                        | 26.670                | 3.106                   | 54.399           | 589.652           | 87.406            |
| 1        | 0                | 114         | 0            | 0.096                    | 12.110                | 6.140                   | 38.143           | 382.589           | 231.904           |
| 1        | 0                | 110         | 0            | 0.691                    | 8.138                 | 7.273                   | 15.434           | 696.976           | 343.028           |
| 0        | 0                | 123         | 3.252        | 0.033                    | 9.014                 | 3.252                   | 16.336           | 355.011           | 392.851           |
| 0        | 0                | 117         | 6.838        | 0.026                    | 11.634                | 3.419                   | 25.619           | 357.585           | 189.839           |
| 0        | 0                | 117         | 2.564        | 0                        | 6.328                 | 2.564                   | 16.657           | 409.405           | 626.633           |
| 0        | 0                | 156         | 0            | 0.006                    | 12.037                | 5.128                   | 18.990           | 429.503           | 286.738           |
| 0        | 0                | 177         | 3.390        | 0.520                    | 11.130                | 1.130                   | 41.510           | 457.402           | 243.929           |
| 0        | 0                | 162         | 0            | 0                        | 16.656                | 2.469                   | 33.639           | 382.757           | 443.012           |
| 0        | 0                | 203         | 0.493        | 0.192                    | 16.491                | 3.941                   | 43.130           | 398.917           | 403.367           |
| 1        | 0                | 83          | 7.229        | 0.012                    | 5.751                 | 3.614                   | 17.087           | 694.233           | 447.438           |
| 0        | 0                | 126         | 4.762        | 0.048                    | 0                     | 0                       | 22.079           | 595.794           | 294.596           |
| 1        | 0                | 126         | 0.794        | 0.778                    | 10.571                | 4.762                   | 21.228           | 449.463           | 514.258           |
| 1        | 0                | 126         | 0            | 0                        | 9.792                 | 1.587                   | 38.923           | 607.316           | 274.766           |
| 0        | 0                | 123         | 2.439        | 0.203                    | 14.556                | 3.252                   | 39.529           | 394.460           | 343.191           |
| 0        | 0                | 117         | 3.419        | 0.009                    | 4.196                 | 3.419                   | 21.702           | 417.255           | 353.429           |
| 0        | 0                | 126         | 1.587        | 0.230                    | 6.627                 | 4.762                   | 28.636           | 405.805           | 515.856           |
| 0        | 0                | 126         | 0.794        | 0.802                    | 17.074                | 5.556                   | 32.467           | 570.705           | 373.272           |
| 0        | 0                | 126         | 2.381        | 0.373                    | 6.551                 | 7.937                   | 3.464            | 223.820           | 461.911           |
| 0        | 0                | 184         | 2.174        | 0.005                    | 6.512                 | 3.804                   | 43.815           | 561.861           | 235.450           |

| Test set | Mutation outcome | Exon length | PESS density | NNSplice density of 5'ss | SF2/ASF score density | FASS-ESS density (hex2) | NI score density | EIE score density | IIE score density |
|----------|------------------|-------------|--------------|--------------------------|-----------------------|-------------------------|------------------|-------------------|-------------------|
| 0        | 0                | 91          | 0            | 0.945                    | 14.724                | 7.692                   | 33.645           | 499.636           | 272.956           |
| 0        | 0                | 110         | 4.545        | 0.155                    | 5.092                 | 2.727                   | 17.101           | 403.390           | 691.431           |
| 0        | 0                | 85          | 2.353        | 0.024                    | 5.047                 | 5.882                   | 36.985           | 429.998           | 339.430           |
| 0        | 0                | 120         | 0            | 0                        | 14.183                | 3.333                   | 42.371           | 679.953           | 155.845           |
| 0        | 0                | 70          | 4.286        | 0                        | 3.166                 | 1.429                   | 28.530           | 383.924           | 28.538            |
| 1        | 0                | 92          | 3.261        | 0.978                    | 4.035                 | 2.174                   | 25.912           | 317.752           | 473.557           |
| 1        | 0                | 198         | 1.010        | 0.586                    | 9.666                 | 3.535                   | 34.571           | 271.265           | 205.417           |
| 0        | 0                | 220         | 2.727        | 0                        | 13.277                | 2.727                   | 21.937           | 236.599           | 304.652           |
| 0        | 0                | 93          | 0            | 0.043                    | 18.325                | 1.075                   | 21.613           | 643.671           | 597.110           |
| 0        | 0                | 47          | 0            | 0                        | 21.376                | 6.383                   | 30.142           | 303.626           | 637.619           |
| 1        | 0                | 111         | 2.703        | 0                        | 7.644                 | 1.802                   | 31.476           | 412.635           | 394.281           |
| 0        | 0                | 66          | 3.030        | 0                        | 4.948                 | 9.091                   | 24.646           | 508.162           | 494.978           |
| 0        | 0                | 114         | 7.018        | 0                        | 10.666                | 4.386                   | 9.948            | 323.292           | 737.978           |
| 0        | 0                | 73          | 0            | 0                        | 11.243                | 5.479                   | 41.904           | 486.206           | 402.607           |
| 0        | 0                | 50          | 6            | 0                        | 25.551                | 0                       | 6.946            | 245.043           | 249.405           |
| 0        | 0                | 120         | 0            | 0.067                    | 10.014                | 8.333                   | 45.731           | 322.272           | 373.457           |
| 0        | 0                | 54          | 1.852        | 0                        | 3.788                 | 3.704                   | 43.009           | 482.883           | 183.760           |
| 1        | 0                | 54          | 0            | 0.093                    | 16.146                | 1.852                   | 50.259           | 697.658           | 165.959           |
| 1        | 0                | 107         | 3.738        | 0.280                    | 10.174                | 7.477                   | 2.193            | 448.529           | 581.204           |
| 0        | 0                | 66          | 3.030        | 0.258                    | 11.856                | 1.515                   | 34.522           | 472.729           | 252.105           |
| 0        | 0                | 47          | 0            | 0.170                    | 17.787                | 2.128                   | 53.067           | 513.006           | 438.148           |
| 0        | 0                | 77          | 1.299        | 0.104                    | 7.662                 | 11.688                  | 6.070            | 317.309           | 763.580           |
| 0        | 0                | 70          | 0            | 1.057                    | 16                    | 7.143                   | 32.529           | 267.916           | 179.691           |
| 0        | 0                | 137         | 0            | 0.547                    | 7.363                 | 5.109                   | 30.211           | 310.081           | 321.637           |
| 1        | 0                | 74          | 1.351        | 0.041                    | 6.964                 | 12.162                  | 26.845           | 464.843           | 396.205           |
| 1        | 0                | 185         | 1.081        | 0                        | 14.149                | 3.243                   | 38.587           | 498.709           | 198.839           |
| 0        | 0                | 138         | 0            | 0.942                    | 15.565                | 0.725                   | 54.163           | 396.790           | 98.554            |
| 0        | 0                | 90          | 1.111        | 0                        | 14.811                | 4.444                   | 45.007           | 556.608           | 56.712            |
| 0        | 0                | 94          | 1.064        | 0.064                    | 5.252                 | 7.447                   | 36.989           | 504.380           | 529.192           |
| 0        | 0                | 111         | 0            | 0.396                    | 9.353                 | 3.604                   | 23.079           | 320.860           | 375.011           |
| 0        | 0                | 99          | 0            | 0.101                    | 13.047                | 1.010                   | 49.477           | 465.510           | 325.005           |
| 0        | 0                | 123         | 1.626        | 0.569                    | 15.106                | 4.065                   | 43.049           | 349.790           | 298.043           |
| 0        | 0                | 72          | 6.944        | 0.014                    | 8.143                 | 1.389                   | 32.035           | 414.860           | 313.698           |
| 0        | 0                | 73          | 0            | 0                        | 7.297                 | 1.370                   | 57.602           | 670.767           | 69.662            |
| 0        | 0                | 89          | 0            | 0.169                    | 11.747                | 4.494                   | 28.769           | 549.858           | 265.305           |
| 1        | 0                | 149         | 2.013        | 0                        | 14.567                | 3.356                   | 39.752           | 733.446           | 300.288           |
| 0        | 0                | 64          | 0            | 0                        | 7.046                 | 6.250                   | -14.888          | 415.229           | 611.466           |
| 0        | 0                | 165         | 3.030        | 0                        | 10.396                | 3.030                   | 37.948           | 555.659           | 469.841           |
| 1        | 0                | 114         | 0.877        | 0.018                    | 21.039                | 1.754                   | 34.416           | 545.002           | 281.581           |
| 0        | 0                | 160         | 1.250        | 0.006                    | 10.828                | 3.125                   | 23.965           | 350.007           | 274.988           |



| Test set | Mutation outcome | Exon length | PESS density | NNSplice density of 5'ss | SF2/ASF score density | FASS-ESS density (hex2) | NI score density | EIE score density | IIE score density |
|----------|------------------|-------------|--------------|--------------------------|-----------------------|-------------------------|------------------|-------------------|-------------------|
| 0        | 0                | 130         | 0            | 0                        | 14.460                | 5.385                   | 34.809           | 501.741           | 258.979           |
| 0        | 0                | 83          | 0            | 0                        | 13.182                | 3.614                   | 44.725           | 704.373           | 124.670           |
| 0        | 0                | 57          | 0            | 0                        | 19.872                | 7.018                   | 35.728           | 373.378           | 535.011           |
| 1        | 0                | 77          | 2.597        | 0                        | 13.113                | 0                       | 24.640           | 407.283           | 176.361           |
| 0        | 0                | 223         | 0            | 0.027                    | 10.733                | 2.242                   | 45.040           | 465.052           | 235.045           |
| 0        | 0                | 144         | 11.111       | 0.333                    | 10.659                | 2.083                   | 3.898            | 377.554           | 277.746           |
| 0        | 0                | 76          | 0            | 0.053                    | 9.625                 | 2.632                   | 26.446           | 477.110           | 264.223           |
| 0        | 0                | 174         | 1.724        | 0.161                    | 2.969                 | 2.299                   | 22.398           | 406.778           | 461.982           |
| 0        | 0                | 123         | 4.065        | 0.813                    | 9.594                 | 3.252                   | 25.702           | 393.742           | 483.441           |
| 0        | 0                | 74          | 0            | 0                        | 15.239                | 0                       | 72.028           | 356.743           | 115.914           |
| 0        | 0                | 441         | 0.907        | 0.639                    | 10.651                | 4.535                   | 30.166           | 396.435           | 427.947           |
| 0        | 0                | 123         | 4.878        | 0.024                    | 3.645                 | 5.691                   | 8.595            | 431.948           | 400.269           |
| 0        | 0                | 182         | 1.648        | 0.341                    | 12.850                | 1.648                   | 29.154           | 316.799           | 241.782           |
| 0        | 0                | 104         | 2.885        | 0.048                    | 0                     | 4.808                   | 20.199           | 540.999           | 409.945           |
| 0        | 0                | 136         | 0.735        | 0.199                    | 9.767                 | 3.676                   | 45.804           | 413.683           | 230.025           |
| 0        | 0                | 341         | 2.053        | 0.085                    | 10.021                | 2.639                   | 23.123           | 334.764           | 201.981           |
| 0        | 0                | 280         | 2.857        | 0.246                    | 7.204                 | 5                       | 7.088            | 302.402           | 422.403           |
| 0        | 0                | 215         | 1.395        | 0.247                    | 9.774                 | 5.581                   | 27.768           | 425.968           | 444.941           |
| 1        | 0                | 102         | 0            | 0.010                    | 4.539                 | 1.961                   | 23.270           | 466.565           | 164.322           |
| 1        | 0                | 101         | 4.950        | 0.782                    | 13.452                | 4.950                   | -5.439           | 307.160           | 657.693           |
| 0        | 0                | 135         | 1.481        | 0.244                    | 5.991                 | 0                       | 24.735           | 865.155           | 312.617           |
| 0        | 0                | 124         | 6.452        | 0                        | 9.252                 | 3.226                   | -5.425           | 378.494           | 348.979           |
| 0        | 0                | 84          | 9.524        | 0.155                    | 12.072                | 5.952                   | 28.553           | 567.843           | 258.383           |
| 1        | 0                | 107         | 1.869        | 0                        | 8.246                 | 7.477                   | 2.372            | 392.980           | 549.865           |
| 0        | 0                | 201         | 3.483        | 0.378                    | 5.545                 | 4.478                   | 16.507           | 452.135           | 490.491           |
| 1        | 0                | 72          | 0            | 0                        | 6.800                 | 1.389                   | 28.172           | 282.561           | 165.104           |
| 0        | 0                | 87          | 1.149        | 0                        | 15.378                | 1.149                   | 10.440           | 260.797           | 508.891           |
| 0        | 0                | 81          | 3.704        | 0.012                    | 3.566                 | 3.704                   | 31.800           | 709.355           | 306.538           |
| 0        | 0                | 94          | 3.191        | 0                        | 6.969                 | 3.191                   | 2.209            | 318.017           | 493.684           |
| 0        | 0                | 54          | 0            | 0.074                    | 20.603                | 12.963                  | 12.129           | 332.098           | 158.542           |
| 1        | 0                | 184         | 1.087        | 0.043                    | 8.422                 | 0                       | 45.589           | 578.145           | 233.713           |
| 0        | 0                | 136         | 0            | 0.015                    | 17.684                | 2.941                   | 27.702           | 282.360           | 374.714           |
| 1        | 0                | 96          | 0            | 0.042                    | 5.049                 | 4.167                   | 15.434           | 336.501           | 587.269           |
| 1        | 0                | 77          | 5.195        | 0.052                    | 16.585                | 7.792                   | 15.104           | 392.229           | 548.624           |
| 1        | 0                | 61          | 0            | 0                        | 3.352                 | 0                       | 47.187           | 362.589           | 18.581            |
| 0        | 0                | 151         | 0.662        | 0                        | 25.092                | 3.974                   | 34.635           | 643.743           | 140.182           |
| 0        | 0                | 116         | 1.724        | 0.009                    | 10.999                | 2.586                   | 38.409           | 426.443           | 116.068           |
| 0        | 0                | 151         | 1.987        | 0.185                    | 20.734                | 1.325                   | 30.502           | 401.184           | 55.244            |
| 0        | 0                | 144         | 1.389        | 0.007                    | 8.551                 | 1.389                   | 24.245           | 420.234           | 290.925           |
| 0        | 0                | 111         | 2.703        | 0.135                    | 11.135                | 0.901                   | 5.472            | 291.935           | 344.744           |

| Test set | Mutation outcome | Exon length | PESS density | NNSplice density of 5'ss | SF2/ASF score density | FASS-ESS density (hex2) | NI score density | EIE score density | IIE score density |
|----------|------------------|-------------|--------------|--------------------------|-----------------------|-------------------------|------------------|-------------------|-------------------|
| 1        | 0                | 48          | 0            | 0                        | 13.871                | 2.083                   | -9.955           | 384.115           | 682.317           |
| 0        | 0                | 100         | 1            | 0                        | 17.984                | 2                       | 52.073           | 580.951           | 180.400           |
| 1        | 0                | 59          | 3.390        | 0.220                    | 10.664                | 0                       | 15.847           | 304.289           | 254.649           |
| 0        | 0                | 407         | 0.246        | 0.221                    | 19.608                | 3.194                   | 40.537           | 449.393           | 220.710           |
| 0        | 0                | 65          | 0            | 0                        | 19.073                | 1.538                   | 49.658           | 191.317           | 213.761           |
| 0        | 0                | 55          | 0            | 0.036                    | 4.643                 | 9.091                   | 8.436            | 471.411           | 566.898           |
| 0        | 0                | 111         | 5.405        | 0                        | 5.020                 | 9.009                   | 7.387            | 674.594           | 217.733           |
| 1        | 0                | 78          | 2.564        | 0.628                    | 12.839                | 5.128                   | 15.068           | 506.263           | 434.247           |
| 0        | 0                | 132         | 0            | 0.038                    | 23.727                | 3.788                   | 44.517           | 471.014           | 159.041           |
| 0        | 0                | 167         | 0            | 0.042                    | 16.570                | 1.796                   | 48.277           | 294.437           | 377.530           |
| 0        | 0                | 170         | 0.588        | 0.065                    | 10.119                | 3.529                   | 28.096           | 404.402           | 252.146           |
| 0        | 0                | 143         | 0.699        | 0.301                    | 18.491                | 3.497                   | 58.132           | 820.083           | 228.620           |
| 1        | 0                | 126         | 0            | 0.063                    | 9.586                 | 0.794                   | 35.209           | 517.547           | 561.893           |
| 0        | 0                | 45          | 0            | 0                        | 0                     | 8.889                   | 18.939           | 443.107           | 457.342           |
| 1        | 0                | 44          | 4.545        | 0                        | 12.240                | 2.273                   | 18.202           | 499.413           | 355.509           |
| 0        | 0                | 142         | 3.521        | 0                        | 5.350                 | 2.817                   | 16.047           | 408.940           | 460.714           |
| 0        | 0                | 167         | 1.796        | 0.389                    | 9.646                 | 2.395                   | 27.983           | 489.604           | 385.094           |
| 0        | 0                | 152         | 1.974        | 0                        | 18.373                | 7.237                   | 33.775           | 696.649           | 254.122           |
| 0        | 0                | 91          | 8.791        | 0                        | 2.907                 | 4.396                   | -0.640           | 530.583           | 671.631           |
| 0        | 0                | 23          | 0            | 0                        | 26.504                | 4.348                   | 30.853           | 542.339           | 555.819           |
| 0        | 0                | 57          | 14.035       | 0                        | 3.487                 | 1.754                   | 23.794           | 693.593           | 227.155           |
| 0        | 0                | 132         | 0.758        | 0.008                    | 11.125                | 2.273                   | 54.102           | 728.689           | 198.252           |
| 0        | 0                | 68          | 7.353        | 0                        | 0                     | 4.412                   | -4.673           | 188.914           | 533.015           |
| 0        | 0                | 122         | 1.639        | 0.008                    | 6.842                 | 8.197                   | 14.454           | 255.842           | 411.969           |
| 1        | 0                | 74          | 4.054        | 0                        | 6.839                 | 5.405                   | 11.909           | 297.256           | 592.810           |
| 0        | 0                | 126         | 4.762        | 1.087                    | 1.779                 | 3.175                   | -0.287           | 390.457           | 599.646           |
| 1        | 0                | 81          | 6.173        | 0.543                    | 7.102                 | 4.938                   | -1.530           | 375.155           | 473.548           |
| 0        | 0                | 80          | 5            | 0                        | 19.413                | 7.500                   | -2.094           | 251.885           | 768.896           |
| 0        | 0                | 101         | 2.970        | 0                        | 4.814                 | 2.970                   | 20.966           | 719.413           | 285.327           |
| 0        | 0                | 112         | 2.679        | 0.009                    | 1.874                 | 5.357                   | 11.172           | 309.830           | 725.090           |
| 0        | 0                | 112         | 0            | 0.080                    | 11.397                | 5.357                   | 32.272           | 550.623           | 199.767           |
| 1        | 0                | 110         | 0            | 0.009                    | 10.516                | 2.727                   | 39.333           | 213.015           | 398.031           |
| 0        | 0                | 188         | 2.128        | 0.080                    | 5.402                 | 3.723                   | 28.494           | 533.898           | 194.296           |
| 0        | 0                | 72          | 2.778        | 0                        | 0                     | 4.167                   | 19.436           | 305.440           | 173.314           |
| 1        | 0                | 92          | 1.087        | 0                        | 3.953                 | 3.261                   | 19.560           | 534.137           | 611.441           |
| 1        | 0                | 80          | 2.500        | 0.025                    | 18.044                | 5                       | 26.082           | 352.185           | 381.399           |
| 0        | 0                | 197         | 0            | 0.122                    | 15.861                | 2.030                   | 47               | 539.801           | 365.193           |
| 0        | 0                | 50          | 0            | 0                        | 26.062                | 2                       | 70.179           | 824.955           | 266.890           |
| 0        | 0                | 185         | 0.541        | 0.124                    | 18.602                | 2.703                   | 45.719           | 458.808           | 306.113           |
| 0        | 0                | 163         | 3.067        | 0.043                    | 7.136                 | 2.454                   | 23.584           | 717.154           | 371.228           |

| Test set | Mutation outcome | Exon length | PESS density | NNSplice density of 5'ss | SF2/ASF score density | FASS-ESS density (hex2) | NI score density | EIE score density | IIE score density |
|----------|------------------|-------------|--------------|--------------------------|-----------------------|-------------------------|------------------|-------------------|-------------------|
| 0        | 0                | 99          | 1.010        | 0.788                    | 9.261                 | 6.061                   | 39.062           | 395.965           | 421.956           |
| 0        | 0                | 74          | 0            | 0.041                    | 13.247                | 2.703                   | 61.963           | 456.822           | 111.142           |
| 0        | 0                | 44          | 0            | 0.045                    | 20.692                | 4.545                   | 39.170           | 497.093           | 430.005           |
| 0        | 0                | 163         | 3.681        | 0.018                    | 8.555                 | 1.227                   | 12.807           | 314.498           | 640.499           |
| 0        | 0                | 63          | 0            | 0                        | 10.028                | 1.587                   | 19.441           | 162.836           | 338.191           |
| 0        | 0                | 162         | 1.235        | 0.401                    | 11.560                | 3.704                   | 37.399           | 368.520           | 278.648           |
| 0        | 0                | 40          | 2.500        | 0                        | 14.482                | 7.500                   | 12.577           | 588.355           | 201.391           |
| 1        | 0                | 87          | 0            | 0                        | 17.748                | 0                       | 43.209           | 428.522           | 248.020           |
| 1        | 0                | 97          | 2.062        | 0.845                    | 35.156                | 1.031                   | 33.628           | 247.790           | 64.551            |
| 0        | 0                | 151         | 1.325        | 0.119                    | 21.197                | 0                       | 41.321           | 398.003           | 257.205           |
| 0        | 1                | 79          | 2.532        | 0.127                    | 21.790                | 1.266                   | 10.921           | 189.468           | 337.033           |
| 0        | 1                | 62          | 3.226        | 0                        | 13.524                | 0                       | 60.303           | 632.112           | 68.326            |
| 1        | 1                | 59          | 0            | 0.203                    | 14.908                | 0                       | 40.709           | 302.668           | 17.108            |
| 0        | 1                | 119         | 0.840        | 0.134                    | 10.218                | 3.361                   | 45.313           | 726.868           | 382.933           |
| 0        | 1                | 178         | 1.124        | 0                        | 12.931                | 0.562                   | 30.084           | 330.342           | 370.401           |
| 0        | 1                | 126         | 1.587        | 0.008                    | 2.591                 | 0.794                   | 14.313           | 388.469           | 330.845           |
| 0        | 1                | 372         | 1.882        | 0.207                    | 8.045                 | 5.376                   | 15.239           | 441.373           | 335.095           |
| 0        | 1                | 177         | 2.825        | 0.011                    | 6.979                 | 3.390                   | 29.625           | 538.920           | 593.390           |
| 0        | 1                | 156         | 4.487        | 0.135                    | 4.867                 | 4.487                   | 8.964            | 449.560           | 587.011           |
| 0        | 1                | 166         | 3.614        | 0                        | 10.731                | 4.819                   | 7.483            | 291.077           | 581.592           |
| 0        | 1                | 140         | 0.714        | 0.386                    | 4.273                 | 4.286                   | 36.365           | 649.399           | 172.859           |
| 0        | 1                | 139         | 5.755        | 0.014                    | 16.642                | 7.194                   | 11.243           | 394.409           | 568.619           |
| 1        | 1                | 106         | 0            | 0.009                    | 11.722                | 2.830                   | 29.184           | 594.846           | 321.217           |
| 0        | 1                | 201         | 0.498        | 0.015                    | 19.221                | 2.985                   | 29.503           | 267.709           | 210.299           |
| 0        | 1                | 119         | 0            | 0                        | 10.804                | 3.361                   | 40.507           | 149.641           | 285.557           |
| 0        | 1                | 284         | 1.056        | 0.141                    | 11.316                | 4.225                   | 33.708           | 444.698           | 331.727           |
| 0        | 1                | 63          | 0            | 0.159                    | 19.816                | 4.762                   | 33.115           | 361.131           | 233.762           |
| 0        | 1                | 27          | 0            | 0                        | 58.576                | 3.704                   | 34.595           | 485.554           | 126.490           |
| 1        | 1                | 81          | 0            | 0.531                    | 27.242                | 3.704                   | 57.391           | 673.504           | 157.350           |
| 0        | 1                | 54          | 0            | 0.019                    | 5.079                 | 0                       | 50.087           | 794.207           | 341.859           |
| 0        | 1                | 54          | 1.852        | 1.259                    | 5.098                 | 5.556                   | 31.191           | 399.861           | 221.523           |
| 0        | 1                | 108         | 0            | 0.120                    | 13.374                | 1.852                   | 58.701           | 819.433           | 196.821           |
| 1        | 1                | 45          | 0            | 0                        | 15.038                | 11.111                  | 60.088           | 819.728           | 243.767           |
| 0        | 1                | 132         | 0            | 0.182                    | 23.167                | 0.758                   | 37.858           | 507.379           | 257.817           |
| 0        | 1                | 63          | 0            | 0.143                    | 19.694                | 4.762                   | 53.982           | 437.390           | 135.232           |
| 0        | 1                | 130         | 0            | 0.785                    | 9.955                 | 2.308                   | 52.165           | 432.909           | 271.878           |
| 0        | 1                | 154         | 0            | 0.013                    | 8.851                 | 5.195                   | 23.898           | 208.953           | 491.950           |
| 0        | 1                | 181         | 0.552        | 0                        | 11.707                | 2.762                   | 44.850           | 700.918           | 301.287           |
| 0        | 1                | 124         | 0            | 0.532                    | 16.925                | 2.419                   | 37.631           | 342.013           | 145.490           |
| 0        | 1                | 320         | 0.625        | 0.119                    | 14.534                | 1.875                   | 38.704           | 404.678           | 319.474           |

| Test set | Mutation outcome | Exon length | PESS density | NNSplice density of 5'ss | SF2/ASF score density | FASS-ESS density (hex2) | NI score density | EIE score density | IIE score density |
|----------|------------------|-------------|--------------|--------------------------|-----------------------|-------------------------|------------------|-------------------|-------------------|
| 0        | 1                | 209         | 4.785        | 0.005                    | 5.192                 | 4.785                   | 23.288           | 449.284           | 551.389           |
| 1        | 1                | 77          | 0            | 0                        | 21.090                | 1.299                   | 50.841           | 538.182           | 80.170            |
| 0        | 1                | 138         | 4.348        | 0                        | 10.611                | 2.899                   | 30.824           | 349.325           | 205.306           |
| 0        | 1                | 291         | 1.031        | 0.182                    | 9.521                 | 4.467                   | 24.275           | 509.692           | 323.515           |
| 1        | 1                | 29          | 0            | 0                        | 26.737                | 0                       | 37.388           | 370.153           | 109.524           |
| 0        | 1                | 107         | 3.738        | 0.280                    | 10.174                | 6.542                   | 2.969            | 443.208           | 581.204           |
| 0        | 1                | 59          | 3.390        | 0                        | 0                     | 3.390                   | 26.699           | 591.508           | 422.559           |
| 0        | 1                | 83          | 2.410        | 0.084                    | 10.754                | 3.614                   | 21.557           | 277.862           | 299.803           |
| 1        | 1                | 77          | 1.299        | 0.104                    | 7.662                 | 9.091                   | 6.353            | 317.309           | 772.233           |
| 1        | 1                | 174         | 0.575        | 0.098                    | 12.233                | 5.172                   | 16.631           | 438.075           | 374.061           |
| 1        | 1                | 127         | 1.575        | 0.598                    | 18.190                | 0.787                   | 32.458           | 278.842           | 406.684           |
| 0        | 1                | 145         | 0.690        | 0.145                    | 7.949                 | 1.379                   | 36.578           | 516.274           | 215.934           |
| 0        | 1                | 166         | 1.807        | 0.452                    | 20.903                | 4.819                   | 38.406           | 525.782           | 186.862           |
| 0        | 1                | 127         | 5.512        | 0.354                    | 5.841                 | 7.874                   | 16.200           | 586.415           | 420.607           |
| 0        | 1                | 83          | 0            | 0                        | 22.342                | 0                       | 36.835           | 323.206           | 117.720           |
| 0        | 1                | 125         | 0            | 0.080                    | 2.994                 | 0.800                   | 34.238           | 361.492           | 486.668           |
| 0        | 1                | 99          | 0            | 0.101                    | 13.047                | 1.010                   | 49.499           | 471.598           | 325.005           |
| 0        | 1                | 126         | 0            | 0.198                    | 16.750                | 3.968                   | 47.290           | 482.313           | 292.716           |
| 1        | 1                | 228         | 0.439        | 0.013                    | 12.183                | 2.632                   | 45.700           | 430.274           | 264.159           |
| 0        | 1                | 123         | 0.813        | 0.480                    | 18.431                | 1.626                   | 45.471           | 530.478           | 169.035           |
| 0        | 1                | 172         | 0.581        | 0.494                    | 19.597                | 6.977                   | 45.473           | 577.369           | 220.088           |
| 0        | 1                | 98          | 0            | 0.010                    | 14.136                | 1.020                   | 46.023           | 436.708           | 388.265           |
| 0        | 1                | 147         | 0.680        | 0.007                    | 9.807                 | 2.721                   | 39.050           | 498.468           | 394.292           |
| 0        | 1                | 258         | 1.550        | 0.023                    | 18.646                | 2.713                   | 42.270           | 480.344           | 455.879           |
| 1        | 1                | 33          | 0            | 0                        | 12.319                | 6.061                   | 43.032           | 604.049           | 133.985           |
| 0        | 1                | 33          | 0            | 0                        | 12.319                | 6.061                   | 43.032           | 604.049           | 133.985           |
| 0        | 1                | 432         | 2.083        | 0.451                    | 7.081                 | 5.556                   | 17.840           | 367.986           | 348.381           |
| 0        | 1                | 164         | 1.220        | 0.305                    | 24.260                | 0.610                   | 51.858           | 526.453           | 71.363            |
| 0        | 1                | 153         | 0.654        | 0                        | 7.476                 | 1.961                   | 35.184           | 747.432           | 335.477           |
| 1        | 1                | 111         | 5.405        | 2                        | 11.898                | 5.405                   | 14.557           | 737.512           | 290.153           |
| 0        | 1                | 114         | 0            | 0.026                    | 13.479                | 7.018                   | 21.005           | 510.964           | 580.350           |
| 0        | 1                | 154         | 1.948        | 0                        | 5.274                 | 1.948                   | 23.428           | 396.441           | 365.409           |
| 0        | 1                | 90          | 1.111        | 0.100                    | 15.099                | 0                       | 31.945           | 588.783           | 341.648           |
| 0        | 1                | 166         | 0            | 0                        | 11.513                | 3.012                   | 47.202           | 492.626           | 292.229           |
| 0        | 1                | 134         | 2.985        | 0.112                    | 10.589                | 8.955                   | 27.045           | 430.614           | 320.602           |
| 0        | 1                | 92          | 0            | 0                        | 17.064                | 1.087                   | 50.594           | 393.923           | 95.450            |
| 0        | 1                | 88          | 1.136        | 0.170                    | 6.662                 | 2.273                   | 27.518           | 524.247           | 295.365           |
| 1        | 1                | 107         | 0            | 0                        | 17.432                | 1.869                   | 60.238           | 612.510           | 41.244            |
| 0        | 1                | 148         | 0.676        | 0.932                    | 16.415                | 3.378                   | 38.250           | 522.857           | 138.643           |
| 1        | 1                | 80          | 2.500        | 0                        | 2.484                 | 6.250                   | 10.046           | 518.262           | 230.749           |

| Test set | Mutation outcome | Exon length | PESS density | NNSplice density of 5'ss | SF2/ASF score density | FASS-ESS density (hex2) | NI score density | EIE score density | IIE score density |
|----------|------------------|-------------|--------------|--------------------------|-----------------------|-------------------------|------------------|-------------------|-------------------|
| 1        | 1                | 142         | 0            | 0                        | 20.085                | 0.704                   | 38.419           | 266.724           | 182.616           |
| 0        | 1                | 157         | 1.274        | 0.357                    | 14.535                | 6.369                   | 31.255           | 578.711           | 283.360           |
| 0        | 1                | 301         | 0.997        | 0.033                    | 17.944                | 2.326                   | 43.364           | 308.044           | 179.452           |
| 1        | 1                | 104         | 1.923        | 0.010                    | 0                     | 6.731                   | 3.224            | 176.517           | 676.724           |
| 0        | 1                | 94          | 4.255        | 0                        | 9.729                 | 3.191                   | 29.214           | 483.961           | 429.729           |
| 1        | 1                | 128         | 1.562        | 0.344                    | 8.977                 | 1.562                   | 29.677           | 634.291           | 354.108           |
| 0        | 1                | 129         | 0            | 0.023                    | 19.556                | 2.326                   | 52.357           | 435.898           | 153.375           |
| 0        | 1                | 214         | 0            | 0.005                    | 11.225                | 2.336                   | 38.896           | 312.626           | 274.807           |
| 0        | 1                | 169         | 0.592        | 0.089                    | 9.564                 | 2.367                   | 36.653           | 386.668           | 432.164           |
| 0        | 1                | 360         | 0.556        | 0.683                    | 7.704                 | 3.056                   | 28.239           | 451.603           | 239.013           |
| 0        | 1                | 137         | 0.730        | 0.708                    | 21.408                | 4.380                   | 44.212           | 508.633           | 313.974           |
| 0        | 1                | 113         | 0            | 0                        | 8.117                 | 3.540                   | 34.583           | 542.361           | 434.866           |
| 0        | 1                | 279         | 0.717        | 0.025                    | 13.170                | 1.434                   | 39.585           | 446.896           | 242.972           |
| 1        | 1                | 144         | 0.694        | 0.042                    | 6.446                 | 4.167                   | 43.579           | 342.249           | 231.401           |
| 1        | 1                | 220         | 1.818        | 0.018                    | 11.520                | 2.273                   | 26.333           | 502.438           | 341.064           |
| 0        | 1                | 420         | 2.143        | 0.295                    | 10.710                | 4.286                   | 19.133           | 455.222           | 377.565           |
| 0        | 1                | 166         | 0.602        | 0.012                    | 7.207                 | 2.410                   | 31.144           | 691.187           | 271.743           |
| 0        | 1                | 66          | 0            | 0.061                    | 11.141                | 6.061                   | 56.456           | 717.254           | 240.101           |
| 0        | 1                | 288         | 0.347        | 0.132                    | 14.569                | 2.083                   | 51.659           | 517.144           | 294.756           |
| 0        | 1                | 115         | 0            | 0.183                    | 18.512                | 1.739                   | 46.056           | 437.614           | 152.434           |
| 0        | 1                | 171         | 1.170        | 0.988                    | 4.646                 | 4.094                   | 23.097           | 523.706           | 217.541           |
| 0        | 1                | 140         | 0.714        | 0.386                    | 4.273                 | 4.286                   | 36.805           | 649.399           | 163.941           |
| 0        | 1                | 78          | 1.282        | 1.167                    | 12.699                | 1.282                   | 16.181           | 511.464           | 391.764           |
| 0        | 1                | 188         | 2.128        | 0.309                    | 11.330                | 2.128                   | 36.857           | 639.293           | 300.961           |
| 1        | 1                | 348         | 0.862        | 0.537                    | 15.929                | 4.598                   | 41.142           | 529.580           | 321.672           |
| 0        | 1                | 109         | 0            | 0.890                    | 11.875                | 2.752                   | 60.352           | 736.515           | 192.113           |
| 0        | 1                | 424         | 0.236        | 0.033                    | 14.033                | 1.887                   | 41.978           | 394.891           | 235.028           |
| 0        | 1                | 227         | 7.048        | 0.216                    | 8.528                 | 0.881                   | 19.856           | 328.593           | 468.043           |
| 0        | 1                | 144         | 0            | 0.014                    | 8.652                 | 3.472                   | 38.732           | 598.514           | 155.704           |
| 0        | 1                | 421         | 0            | 0.102                    | 28.465                | 4.988                   | 32.719           | 286.908           | 229.143           |
| 0        | 1                | 307         | 0.651        | 0.143                    | 25.237                | 2.932                   | 38.077           | 304.458           | 177.331           |
| 0        | 1                | 216         | 2.315        | 0.060                    | 9.171                 | 3.704                   | 14.903           | 457.563           | 385.142           |
| 0        | 1                | 115         | 0            | 0                        | 12.617                | 7.826                   | 25.635           | 316.697           | 236.828           |
| 1        | 1                | 54          | 0            | 1.352                    | 19.079                | 5.556                   | 40.516           | 257.960           | 275.223           |
| 0        | 1                | 54          | 0            | 0.019                    | 5.716                 | 5.556                   | 37.630           | 688.686           | 269.986           |
| 0        | 1                | 108         | 0            | 0.380                    | 12.448                | 3.704                   | 28.221           | 278.286           | 150.861           |
| 0        | 1                | 162         | 0            | 1.056                    | 3.176                 | 3.704                   | 43.119           | 405.805           | 280.216           |
| 0        | 1                | 99          | 0            | 0.768                    | 12.185                | 5.051                   | 29.601           | 443.808           | 291.519           |
| 0        | 1                | 201         | 0            | 0.184                    | 6.433                 | 3.483                   | 45.848           | 577.225           | 198.083           |
| 0        | 1                | 160         | 0.625        | 0.062                    | 17.621                | 6.250                   | 27.546           | 287.931           | 302.013           |

| Test set | Mutation outcome | Exon length | PESS density | NNSplice density of 5'ss | SF2/ASF score density | FASS-ESS density (hex2) | NI score density | EIE score density | IIE score density |
|----------|------------------|-------------|--------------|--------------------------|-----------------------|-------------------------|------------------|-------------------|-------------------|
| 0        | 1                | 72          | 0            | 0                        | 20.003                | 2.778                   | 44.144           | 577.114           | 174.483           |
| 0        | 1                | 121         | 2.479        | 0.760                    | 25.471                | 10.744                  | 35.143           | 516.900           | 443.099           |
| 1        | 1                | 131         | 1.527        | 1.069                    | 8.765                 | 0                       | 32.351           | 283.688           | 383.478           |
| 0        | 1                | 173         | 0.578        | 0.012                    | 10.941                | 2.890                   | 38.234           | 499.755           | 235.319           |
| 0        | 1                | 167         | 0            | 0.030                    | 10.250                | 4.790                   | 47.682           | 402.622           | 271.481           |
| 1        | 1                | 174         | 0.575        | 0.431                    | 5.348                 | 3.448                   | 38.638           | 680.875           | 366.762           |
| 0        | 1                | 211         | 0            | 0.393                    | 9.964                 | 7.109                   | 29.599           | 601.459           | 406.049           |
| 0        | 1                | 195         | 0.513        | 0.154                    | 21.449                | 2.051                   | 53.396           | 405.910           | 322.600           |
| 1        | 1                | 131         | 1.527        | 0.427                    | 10.221                | 3.817                   | 24.701           | 507.595           | 251.751           |
| 0        | 1                | 231         | 0.866        | 0.169                    | 18.974                | 2.165                   | 38.052           | 232.806           | 245.394           |
| 1        | 1                | 225         | 0            | 0.058                    | 10.776                | 5.333                   | 42.211           | 360.850           | 473.210           |
| 0        | 1                | 143         | 0            | 0.084                    | 23.765                | 2.797                   | 44.455           | 474.582           | 240.482           |
| 0        | 1                | 81          | 0            | 0.840                    | 17.456                | 2.469                   | 41.638           | 505.264           | 404.194           |
| 1        | 1                | 215         | 1.860        | 0.153                    | 9.771                 | 0.930                   | 40.641           | 601.706           | 95.332            |
| 0        | 1                | 165         | 1.212        | 0.412                    | 6.554                 | 4.242                   | 36.301           | 396.561           | 525.210           |
| 0        | 1                | 146         | 2.055        | 0.041                    | 14.486                | 0.685                   | 45.413           | 642.675           | 242.101           |
| 0        | 1                | 286         | 1.049        | 0.524                    | 17.493                | 2.098                   | 41.917           | 626.416           | 185.055           |
| 0        | 1                | 145         | 0.690        | 0.731                    | 10.410                | 3.448                   | 3.558            | 175.994           | 384.431           |
| 0        | 1                | 151         | 0            | 0                        | 13.755                | 0                       | 58.018           | 685.195           | 176.645           |
| 0        | 1                | 165         | 1.212        | 0.139                    | 20.459                | 7.273                   | 43.389           | 548.929           | 286.090           |
| 1        | 1                | 120         | 0            | 0.083                    | 12.161                | 3.333                   | 54.182           | 570.955           | 219.926           |
| 1        | 1                | 165         | 0            | 0.012                    | 12.136                | 2.424                   | 45.617           | 419.641           | 185.939           |
| 0        | 1                | 161         | 0            | 0.646                    | 19.822                | 3.727                   | 41.161           | 457.214           | 155.308           |
| 1        | 1                | 161         | 0            | 1.261                    | 22.449                | 3.727                   | 41.263           | 425.102           | 184.834           |
| 1        | 1                | 267         | 1.498        | 0.341                    | 14.923                | 3.745                   | 35.402           | 391.929           | 347.643           |
| 0        | 1                | 181         | 2.210        | 0.055                    | 4.774                 | 4.420                   | 19.689           | 626.870           | 360.464           |
| 0        | 1                | 114         | 0.877        | 0.114                    | 25.146                | 3.509                   | 48.057           | 406.307           | 206.393           |
| 0        | 1                | 301         | 0            | 0.017                    | 22.808                | 7.973                   | 38.268           | 578.831           | 337.381           |
| 0        | 1                | 186         | 1.075        | 0.188                    | 12.678                | 4.301                   | 40.336           | 322.175           | 343.782           |
| 0        | 1                | 135         | 0            | 0.726                    | 13.578                | 2.222                   | 35.848           | 450.296           | 210.333           |
| 1        | 1                | 178         | 1.124        | 0.062                    | 15.200                | 2.247                   | 39.734           | 574.758           | 226.808           |
| 0        | 1                | 171         | 0            | 0.029                    | 16.252                | 1.754                   | 46.799           | 696.941           | 258.089           |
| 0        | 1                | 293         | 0            | 0.191                    | 13.947                | 1.365                   | 54.771           | 471.218           | 101.278           |
| 1        | 1                | 140         | 0            | 0.679                    | 14.319                | 2.857                   | 44.839           | 431.266           | 412.921           |
| 0        | 1                | 138         | 0            | 0.942                    | 13.441                | 0.725                   | 55.254           | 396.915           | 98.554            |
| 0        | 1                | 105         | 0            | 0.476                    | 15.995                | 0                       | 69.120           | 584.275           | 260.978           |
| 1        | 1                | 555         | 0.360        | 0.472                    | 13.644                | 6.126                   | 32.390           | 379.635           | 432.510           |
| 0        | 1                | 162         | 0.617        | 0.352                    | 14.459                | 4.321                   | 53.138           | 804.890           | 202.377           |
| 0        | 1                | 203         | 0.493        | 0.094                    | 11.855                | 3.941                   | 35.964           | 337.285           | 224.765           |
| 0        | 1                | 171         | 0            | 1.070                    | 27.843                | 2.339                   | 46.947           | 382.272           | 134.681           |

| Test set | Mutation outcome | Exon length | PESS density | NNSplice density of 5'ss | SF2/ASF score density | FASS-ESS density (hex2) | NI score density | EIE score density | IIE score density |
|----------|------------------|-------------|--------------|--------------------------|-----------------------|-------------------------|------------------|-------------------|-------------------|
| 0        | 1                | 171         | 0.585        | 0.561                    | 12.163                | 3.509                   | 54.165           | 737.446           | 230.407           |
| 0        | 1                | 270         | 0            | 0.296                    | 20.686                | 5.926                   | 41.166           | 363.531           | 222.044           |
| 0        | 1                | 160         | 1.875        | 0.481                    | 19.094                | 1.250                   | 32.936           | 363.975           | 118.162           |
| 1        | 1                | 183         | 2.186        | 0.656                    | 17.169                | 2.732                   | 37.414           | 609.527           | 198.068           |
| 0        | 1                | 117         | 1.709        | 0.590                    | 19.923                | 0.855                   | 31.907           | 446.740           | 158.948           |
| 0        | 1                | 119         | 0            | 0.218                    | 26.869                | 5.042                   | 36.320           | 416.742           | 439.589           |
| 0        | 1                | 130         | 0            | 0                        | 27.058                | 3.077                   | 41.782           | 343.453           | 74.318            |
| 0        | 1                | 207         | 1.449        | 0.430                    | 15.536                | 0.966                   | 38.461           | 544.424           | 211.561           |
| 0        | 1                | 351         | 0.285        | 0.387                    | 12.359                | 1.425                   | 44.145           | 460.183           | 114.262           |
| 0        | 1                | 164         | 0.610        | 0.329                    | 2.748                 | 2.439                   | 43.187           | 667.849           | 328.448           |
| 0        | 1                | 200         | 2.500        | 0.140                    | 4.213                 | 4.500                   | 31.248           | 677.722           | 288.476           |
| 0        | 1                | 194         | 1.546        | 0.046                    | 10.712                | 0.515                   | 32.475           | 318.632           | 302.828           |
| 0        | 1                | 132         | 0.758        | 1.341                    | 8.912                 | 1.515                   | 44.389           | 629.219           | 273.338           |
| 0        | 1                | 111         | 11.712       | 0.811                    | 8.475                 | 0.901                   | 18.812           | 596.279           | 565.880           |
| 0        | 1                | 433         | 2.540        | 0.450                    | 7.065                 | 5.774                   | 16.732           | 368.706           | 339.449           |
| 0        | 1                | 144         | 10.417       | 0.333                    | 10.659                | 2.083                   | 3.683            | 373.333           | 303.060           |
| 0        | 1                | 194         | 2.062        | 0.005                    | 3.992                 | 6.186                   | 25.839           | 473.667           | 377.792           |
| 0        | 1                | 121         | 0            | 0.835                    | 15.367                | 2.479                   | 43.384           | 406.604           | 272.779           |
| 0        | 1                | 109         | 0            | 0                        | 2.592                 | 1.835                   | 43.495           | 470.471           | 418.047           |
| 0        | 1                | 244         | 1.230        | 0.094                    | 11.988                | 5.328                   | 30.232           | 272.227           | 459.961           |
| 0        | 1                | 177         | 0            | 0                        | 10.653                | 1.130                   | 60.334           | 975.205           | 167.967           |
| 1        | 1                | 102         | 0            | 0.843                    | 24.086                | 0.980                   | 33.140           | 271.311           | 172.023           |
| 0        | 0                | 139         | 0.719        | 0.043                    | 8.046                 | 2.878                   | 37.350           | 828.782           | 243.061           |
| 0        | 0                | 94          | 3.191        | 0.128                    | 11.067                | 3.191                   | 28.588           | 480.772           | 278.553           |
| 0        | 0                | 86          | 0            | 0                        | 6.412                 | 0                       | 30.417           | 387.125           | 337.737           |
| 1        | 0                | 144         | 0.694        | 0.062                    | 17.054                | 4.167                   | 46.910           | 640.496           | 202.077           |
| 0        | 0                | 157         | 4.459        | 0.076                    | 12.729                | 2.548                   | 39.916           | 652.849           | 235.967           |
| 0        | 0                | 109         | 3.670        | 0.018                    | 5.979                 | 0                       | 14.305           | 519.915           | 518.555           |
| 0        | 0                | 71          | 0            | 0                        | 8.680                 | 0                       | 52.307           | 483.119           | 162.522           |
| 0        | 0                | 244         | 0            | 0.102                    | 17.373                | 4.918                   | 43.063           | 522.638           | 270.721           |
| 0        | 0                | 207         | 0.966        | 0.304                    | 21.723                | 3.382                   | 52.359           | 404.810           | 291.337           |
| 0        | 0                | 193         | 1.554        | 0.824                    | 16.791                | 7.772                   | 34.431           | 331.225           | 412.257           |
| 0        | 0                | 156         | 0.641        | 0.526                    | 17.519                | 3.205                   | 40.980           | 493.865           | 275.236           |
| 0        | 0                | 127         | 0            | 0.787                    | 18.387                | 2.362                   | 51.786           | 551.735           | 171.459           |
| 0        | 0                | 36          | 0            | 0                        | 0                     | 11.111                  | -28.508          | 129.636           | 629.140           |
| 0        | 0                | 115         | 4.348        | 0.043                    | 5.954                 | 8.696                   | 7.128            | 473.904           | 519.345           |
| 0        | 0                | 171         | 1.754        | 0.573                    | 1.493                 | 5.263                   | 12.547           | 381.635           | 418.846           |
| 0        | 0                | 249         | 2.410        | 0.008                    | 6.943                 | 2.410                   | 31.546           | 478.783           | 163.983           |
| 0        | 0                | 245         | 3.265        | 0.004                    | 4.474                 | 2.041                   | 12.091           | 391.678           | 496.334           |
| 0        | 0                | 128         | 2.344        | 0.406                    | 9.073                 | 4.688                   | 19.911           | 438.700           | 280.384           |

| Test set | Mutation outcome | Exon length | PESS density | NNSplice density of 5'ss | SF2/ASF score density | FASS-ESS density (hex2) | NI score density | EIE score density | IIE score density |
|----------|------------------|-------------|--------------|--------------------------|-----------------------|-------------------------|------------------|-------------------|-------------------|
| 0        | 0                | 116         | 0            | 0                        | 20.121                | 5.172                   | 35.639           | 274.024           | 532.887           |
| 0        | 0                | 127         | 0            | 0.024                    | 22.115                | 0                       | 46.696           | 456.797           | 70.128            |
| 0        | 0                | 87          | 0            | 0                        | 2.774                 | 1.149                   | 51.506           | 513.624           | 244.033           |
| 0        | 0                | 157         | 0            | 0                        | 18.098                | 3.822                   | 38.207           | 484.916           | 311.248           |
| 0        | 0                | 118         | 0            | 0                        | 20.186                | 3.390                   | 56.197           | 500.579           | 240.079           |
| 0        | 0                | 140         | 1.429        | 0.207                    | 28.641                | 3.571                   | 48.874           | 528.790           | 225.022           |
| 0        | 0                | 127         | 0            | 0.024                    | 6.629                 | 4.724                   | 21.971           | 753.591           | 528.044           |
| 0        | 0                | 116         | 0.862        | 0                        | 6.756                 | 6.897                   | 27.579           | 625.917           | 395.815           |
| 0        | 0                | 78          | 12.821       | 0                        | 6.904                 | 1.282                   | -5.928           | 441.347           | 656.418           |
| 0        | 0                | 110         | 6.364        | 0                        | 9.320                 | 2.727                   | 11.521           | 389.724           | 320.773           |
| 0        | 0                | 88          | 7.955        | 0                        | 2.232                 | 1.136                   | 17.630           | 432.607           | 328.814           |
| 0        | 0                | 117         | 1.709        | 0.034                    | 10.642                | 3.419                   | 39.217           | 593.709           | 307.434           |
| 0        | 0                | 32          | 0            | 0                        | 0                     | 12.500                  | 20.195           | 769.258           | 205.247           |
| 0        | 0                | 197         | 2.538        | 0.005                    | 5.385                 | 1.523                   | 28.400           | 416.637           | 386.396           |
| 0        | 0                | 146         | 4.110        | 0.712                    | 3.637                 | 1.370                   | 20.446           | 629.186           | 218.509           |
| 0        | 0                | 105         | 0            | 0.133                    | 2.317                 | 2.857                   | 11.450           | 389.503           | 336.422           |
| 0        | 0                | 31          | 0            | 0.903                    | 0                     | 12.903                  | 4.004            | 63.061            | 383.374           |
| 1        | 0                | 143         | 2.797        | 0.685                    | 11.537                | 1.399                   | 46.862           | 773.759           | 210.025           |
| 0        | 0                | 156         | 0.641        | 0.128                    | 5.885                 | 5.769                   | 24.213           | 470.269           | 381.649           |
| 0        | 0                | 71          | 0            | 0                        | 18.732                | 1.408                   | 57.072           | 458.011           | 179.215           |
| 0        | 0                | 110         | 0            | 0.027                    | 7.459                 | 0.909                   | 35.249           | 313.222           | 339.368           |
| 0        | 0                | 107         | 1.869        | 0.009                    | 3.749                 | 3.738                   | 20.184           | 393.305           | 357.387           |
| 0        | 0                | 78          | 0            | 0                        | 18.744                | 5.128                   | 33.067           | 503.487           | 411.153           |
| 0        | 0                | 49          | 0            | 0                        | 34.459                | 0                       | 87.807           | 1039.782          | 78.437            |
| 0        | 0                | 75          | 1.333        | 0.067                    | 11.816                | 0                       | 54.524           | 693.888           | 118.542           |
| 0        | 0                | 131         | 3.053        | 0.527                    | 15.441                | 3.817                   | 38.038           | 647.013           | 294.448           |
| 0        | 0                | 125         | 5.600        | 0.008                    | 5.485                 | 1.600                   | 17.866           | 610.968           | 190.666           |
| 1        | 0                | 193         | 1.554        | 0.824                    | 16.791                | 7.772                   | 34.431           | 331.225           | 412.257           |
| 1        | 0                | 113         | 0            | 0                        | 4.042                 | 2.655                   | 31.694           | 431.735           | 371.942           |
| 0        | 1                | 134         | 0            | 0.381                    | 6.172                 | 2.239                   | 27.131           | 409.817           | 392.647           |
| 0        | 1                | 116         | 2.586        | 1                        | 8.415                 | 4.310                   | 34.348           | 617.528           | 294.784           |
| 0        | 1                | 1702        | 0.294        | 0.221                    | 16.812                | 2.703                   | 43.568           | 430.464           | 249.875           |
| 0        | 1                | 126         | 0            | 0.198                    | 18.469                | 2.381                   | 54.712           | 525.304           | 265.967           |
| 1        | 1                | 642         | 1.402        | 0.283                    | 6.858                 | 4.829                   | 20.773           | 400.452           | 464.380           |
| 0        | 1                | 188         | 4.255        | 0.660                    | 5.514                 | 6.383                   | 10.868           | 582.890           | 402.334           |
| 1        | 1                | 403         | 0.744        | 0.025                    | 12.830                | 2.978                   | 24.382           | 211.202           | 168.542           |
| 0        | 1                | 111         | 0            | 0.072                    | 19.555                | 6.306                   | 11.667           | 260.885           | 256.729           |
| 0        | 1                | 140         | 0            | 0.700                    | 20.359                | 1.429                   | 51.426           | 589.922           | 206.663           |
| 0        | 1                | 145         | 4.828        | 0.007                    | 8.684                 | 3.448                   | 11.732           | 582.132           | 354.804           |
| 1        | 1                | 84          | 5.952        | 0.940                    | 3.954                 | 3.571                   | 20.774           | 279.629           | 73.252            |



| Test set | Mutation outcome | Exon length | PESS density | NNSplice density of 5'ss | SF2/ASF score density | FASS-ESS density (hex2) | NI score density | EIE score density | IIE score density |
|----------|------------------|-------------|--------------|--------------------------|-----------------------|-------------------------|------------------|-------------------|-------------------|
| 0        | 1                | 190         | 3.158        | 0.084                    | 7.279                 | 1.053                   | 26.295           | 379.569           | 304.161           |
| 0        | 1                | 251         | 0.398        | 0.494                    | 15.054                | 3.586                   | 39.876           | 531.306           | 264.662           |
| 1        | 1                | 85          | 1.176        | 0                        | 3.570                 | 3.529                   | 14.889           | 359.296           | 461.700           |
| 0        | 1                | 148         | 0            | 0.527                    | 8.815                 | 1.351                   | 49.934           | 533.518           | 124.368           |
| 1        | 1                | 150         | 7.333        | 0.660                    | 5.049                 | 5.333                   | 9.902            | 434.569           | 642.587           |
| 0        | 1                | 159         | 3.774        | 0.094                    | 8.401                 | 2.516                   | 21.226           | 480.723           | 399.962           |
| 0        | 1                | 157         | 1.274        | 0.357                    | 14.535                | 7.006                   | 29.749           | 561.405           | 266.031           |
| 0        | 1                | 130         | 2.308        | 1.031                    | 6.744                 | 6.154                   | 33.332           | 530.265           | 325.733           |
| 0        | 1                | 650         | 1.231        | 0.117                    | 13.024                | 3.077                   | 45.986           | 468.264           | 241.662           |
| 0        | 1                | 192         | 1.042        | 0.917                    | 8.562                 | 2.083                   | 37.190           | 399.900           | 371.342           |
| 0        | 1                | 177         | 5.650        | 0.469                    | 2.854                 | 5.085                   | -6.100           | 480.882           | 582.022           |
| 0        | 1                | 121         | 0            | 0.835                    | 15.367                | 2.479                   | 43.384           | 406.604           | 272.779           |
| 0        | 1                | 170         | 1.765        | 0.682                    | 14.365                | 5.294                   | 36.533           | 372.658           | 246.362           |
| 0        | 1                | 184         | 0            | 0.016                    | 14.656                | 1.630                   | 40.364           | 467.829           | 264.397           |
| 1        | 1                | 279         | 0.717        | 0.025                    | 12.287                | 1.434                   | 39.432           | 446.896           | 242.972           |
| 0        | 1                | 156         | 1.282        | 0.449                    | 14.366                | 5.128                   | 43.947           | 405.624           | 244.613           |
| 0        | 1                | 243         | 2.881        | 0.391                    | 7.671                 | 4.938                   | 30.580           | 354.454           | 488.037           |
| 0        | 1                | 123         | 3.252        | 0.008                    | 17.308                | 0.813                   | 18.690           | 150.243           | 466.474           |
| 0        | 1                | 93          | 0            | 1.065                    | 24.472                | 4.301                   | 34.989           | 410.955           | 142.974           |
| 0        | 1                | 237         | 0            | 0.097                    | 19.446                | 1.688                   | 39.207           | 315.319           | 164.679           |
| 0        | 1                | 302         | 1.325        | 0.407                    | 9.096                 | 3.311                   | 25.130           | 341.157           | 512.821           |

**Supplementary Table 3. Univariate logistic regression analyses**

|                |          | Exon<br>length | PESS<br>density | NNSplice<br>density of 5'ss | SF2/ASF<br>score density | FAS-ESS<br>density (hex2) | NI score<br>density | EIE score<br>density | IIE score<br>density |
|----------------|----------|----------------|-----------------|-----------------------------|--------------------------|---------------------------|---------------------|----------------------|----------------------|
| Before         | <i>P</i> | <0.001         | 0.003           | <0.001                      | <0.001                   | 0.004                     | <0.001              | 0.48                 | 0.01                 |
| transformation | AIC      | 502.1          | 536.8           | 530.6                       | 534.7                    | 537.5                     | 533.9               | 545.3                | 538.2                |
| After          | <i>P</i> | <0.001         | -               | <0.001                      | <0.001                   | <0.001                    | -                   | -                    | -                    |
| transformation | AIC      | 498.5          | -               | 519.8                       | 528.5                    | 528.7                     | -                   | -                    | -                    |

**Legend:** *P*, p-value of the likelihood ratio test of the predictor significance. AIC, the Akaike's information criterion (a measure of the goodness of fit of estimated models).

**Supplementary Table 4. Model comparison**

| Model                                  | P-value <sup>1</sup> | AIC    | Discrimination                      |                                  |                                            |                                         |
|----------------------------------------|----------------------|--------|-------------------------------------|----------------------------------|--------------------------------------------|-----------------------------------------|
|                                        |                      |        | % of EXSK among $P_{CR-E} \leq 0.5$ | % of CR-E among $P_{CR-E} > 0.5$ | % of $P_{CR-E} \leq 0.5$ among EXSK events | % of $P_{CR-E} > 0.5$ among CR-E events |
| <b>Initial model</b>                   | -                    | 477.41 | 72.9                                | 65.0                             | 79.0                                       | 57.1                                    |
| <b>Final model</b>                     | 0.83                 | 473.80 | 72.9                                | 65.5                             | 79.4                                       | 57.1                                    |
| <b>Reduced model</b>                   | 0.57                 | 473.42 | 71.9                                | 63.8                             | 78.6                                       | 55.2                                    |
| <b>Final model (no transformation)</b> | 1.00 <sup>2</sup>    | 473.07 | 70.7                                | 62.3                             | 78.1                                       | 52.8                                    |

**Legend:** Quality of discrimination was evaluated using leave-one-out cross-validation on the training set. Predictors in the initial model:  $\log_e(\text{exon length})$ , PESS density, min(NNSplice density of 5'ss, 0.2), min(SF2/ASF score density, 10), max(FASS-ESS density (hex2), 6.5), NI score density, EIE score density, and IIE score density. Predictors in the final model:  $\log_e(\text{exon length})$ , PESS density, min(NNSplice density of 5'ss, 0.2), min(SF2/ASF score density, 10), max(FASS-ESS density (hex2), 6.5), EIE score density. Predictors in the reduced model:  $\log_e(\text{exon length})$ , PESS density, min(NNSplice density of 5'ss, 0.2), min(SF2/ASF score density, 10), max(FASS-ESS density (hex2), 6.5). Predictors in the final model without transformations: exon length, PESS density, NNSplice density of 5'ss, SF2/ASF score density, FASS-ESS density (hex2), EIE score density. <sup>1</sup>P value of the likelihood ratio test vs. the initial model. <sup>2</sup>, the initial model was without transformation.

**Supplemental Table 5. CRYP-SKIP performance in predicting exon skipping in *RB1***

**Legend:** <sup>1</sup>, exons that were skipped as a result of splicing mutations in *RB1* <sup>1, 2</sup>, probability of cryptic splice-site activation.

| <i>RB1</i> exon skipping <sup>1</sup> | Pcr-e <sup>2</sup> | Exon size (nt) |
|---------------------------------------|--------------------|----------------|
| 2                                     | 0.408              | 127            |
| 3                                     | 0.276              | 116            |
| 6                                     | 0.087              | 68             |
| 9                                     | 0.044              | 78             |
| 10                                    | 0.169              | 110            |
| 12                                    | 0.059              | 88             |
| 14                                    | 0.074              | 57             |
| 15                                    | 0.007              | 32             |
| 16                                    | 0.041              | 77             |
| 17                                    | 0.326              | 197            |
| 19                                    | 0.410              | 146            |
| 21                                    | 0.287              | 105            |
| 24                                    | 0.007              | 31             |
| 25                                    | 0.643              | 143            |

**Reference**

1 Houdayer C, Dehainault C, Mattler C *et al*: Evaluation of in silico splice tools for decision-making in molecular diagnosis. *Hum Mutat* 2008; **29**: 975-982.
